# Supplementary material for: One-step assembly of a MacMillan catalyst-based phenolic-type polymer
Source: Royal Society of Chemistry journal article supplement (doi:10.1039/d3ob00624g), 2023-01-01
Supplement: d3ob00624g1.pdf [file d3ob00624g1.pdf]

## Electronic Supplementary Information

### **One-step Assembly of MacMillan Catalyst-Based Phenolic-Type Polymer**

Yuan Zhang,<sup>a,\*</sup> Xiaorong Yang,<sup>b</sup> Liqi Li,<sup>a</sup> Yansong Hu,<sup>a</sup> and Shutao Wang<sup>a</sup>

<sup>a</sup> State Key Laboratory of Applied Organic Chemistry, College of Chemistry and Chemical Engineering, Lanzhou University, 222 Tianshui South Road, Lanzhou 730000, P. R. China.

<sup>b</sup> Lanzhou Institute of Husbandry and Pharmaceutical Sciences, Chinese Academy of Agricultural Sciences, Lanzhou 730050, P.R. China.

\*E-mail: zhangyuan@lzu.edu.cn.

#### **Table of Contents**

|                                                             |     |
|-------------------------------------------------------------|-----|
| 1. Experiment Information and Product Data                  | S2  |
| 2. References                                               | S15 |
| 3. Copies of <sup>1</sup> H and <sup>13</sup> C NMR Spectra | S17 |
| 4. HPLC Spectra of Products                                 | S29 |

## 1. Experiment Information and Product Data

### 1.1 General Information.

Unless otherwise noted, all reagents were purchased from commercial sources and used as received without further purification. Racemic standard products were prepared using *DL*-proline as catalyst in order to establish HPLC conditions. The silica gel (200–300 meshes) was used for column chromatography and TLC inspections were taken on silica gel GF254 plates. Elemental analysis was carried out on an Elementar Analysensysteme GmbH Vario EL V3.00 elemental analyzer. Liquid  $^1\text{H}$  and  $^{13}\text{C}$  NMR spectra were recorded on a Bruker Avance III 400 MHz spectrometer. High resolution mass spectra (HRMS) were obtained on a mass spectrometer by using electrospray ionization (ESI) analyzed by quadrupole time-of-flight (QToF). High performance liquid chromatography (HPLC) analysis was performed on a Waters 1525 Delta or an Agilent 1260 equipment, using Daicel Chiralpak OJ-H or OD-H columns and with *i*-PrOH/hexane as the eluent. Solid-state NMR spectra were obtained on a WB 400 MHz Bruker Avance II spectrometer. The  $^{13}\text{C}$  CP/MAS NMR spectra were recorded with the contact time of 3 ms (ramp 100) and the recycle delay of 2 s with a 4-mm double-resonance probe. FT-IR spectra were recorded on a Nicolet NEXUS 670 instrument. The morphology and size of the obtained sample was characterized by a JEOL-6701F field-emission scanning electron microscope (SEM, operated at 10 kV).

### 1.2 Synthesis of chiral precursor 1.<sup>1</sup>

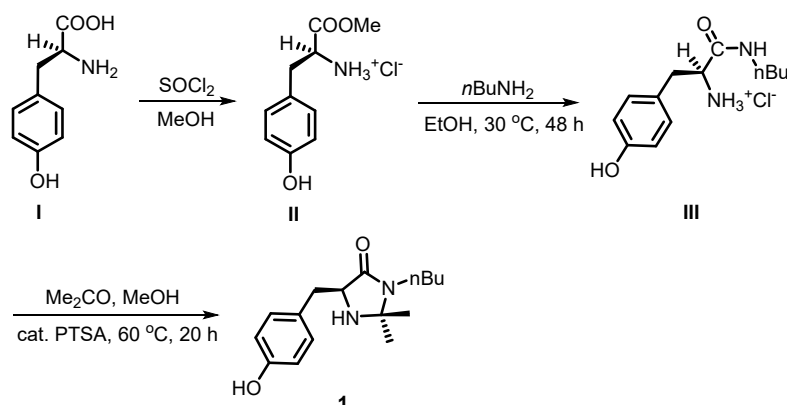

To a suspension of *L*-tyrosine (10.0 g, 55.2 mmol) in ice-cooled dry methanol (30 mL), thionyl chloride (16.0 mL, 220.0 mmol) was added dropwise under argon. After the addition was complete, the cooling bath was removed and the mixture was stirred at room temperature for 24 h. Then the solvent was removed under reduced pressure to give (*S*)-tyrosine methyl ester hydrochloride (II) as a yellow solid quantitatively, which was directly used in the next step without further purification. (*S*)-tyrosine

methyl ester hydrochloride (**II**) was added in one portion to a solution of *n*-butylamine (35 mL) in dry ethanol (20 mL), and the resulting solution was stirred at room temperature until the amino ester was judged to be consumed as determined by TLC (ca. 48 h). After removal of the organic solvents under vacuum, the residue was suspended in Et<sub>2</sub>O and then concentrated under vacuum. This Et<sub>2</sub>O addition–removal cycle was repeated several times to remove excess *n*-butylamine. The product was directly used for the next step without further purification. Dry MeOH (50 mL), dry acetone (100 mL) and PTSA (0.199 g) was added to the crude product (**III**). The resulting solution was heated to 60 °C for 24 h and concentrated under vacuum to afford a crude product, which was purified by silica gel chromatography (petroleum ether/EtOAc = 3:2) to provide chiral precursor **1** as a white solid (10.5 g) in 70% overall yield. <sup>1</sup>H NMR (400 MHz, CDCl<sub>3</sub>): δ 7.06-7.03 (m, 2H), 6.76-6.73 (m, 2H), 3.74 (t, *J* = 5.2 Hz, 1H), 3.35-3.28 (m, 1H), 3.10-2.87 (m, 3H), 1.53-1.45 (m, 2H), 1.31-1.25 (m, 5H), 1.18 (s, 3H), 0.93-0.88 (m, 3H); <sup>13</sup>CNMR (100 MHz, CDCl<sub>3</sub>): δ 174.1, 155.7, 130.7, 127.0, 115.7, 76.4, 58.8, 40.4, 35.4, 31.3, 27.7, 26.2, 20.3, 13.7.

### 1.3 Synthesis of Mac-CP.

To a suspension of chiral precursor **1** (276 mg, 1.0 mmol) and formaldehyde (37% aqueous solution; 243 mg, 3.0 mmol) in water (0.2 mL), 20% NaOH solution (0.1 mmol) was added dropwise. The mixture was stirred at 45 °C for 10 min, then heated to 75 °C and stirred at this temperature for 3 h. After cooling, the solution was neutralized with 0.6 M HCl, the resulting solid was crushed, then filtered and washed with water, hexane and Et<sub>2</sub>O in turn (3 times each). After dried under vacuum for 12 h, **Mac-CP** was obtained as a light-pink solid (265 mg). Elemental analysis calcd (%) for C<sub>17</sub>H<sub>26</sub>N<sub>2</sub>O<sub>2</sub>: C 70.31, H 9.02, N 9.65; found: C 66.49, H 7.64, N 8.56.

### 1.4 General procedure for the asymmetric Diels-Alder reaction.

To a solution of catalyst **Mac-CP** (6.5 mg, 0.02 mmol) in CH<sub>3</sub>CN/H<sub>2</sub>O (0.05 mL, 95/5 v/v) was added α, β-unsaturated aldehyde (0.1 mmol) and cyclopentadiene (0.042 mL, 0.5 mmol, 5 eq). The solution was stirred for 2 minutes before the addition of TFA (1.5 μL, 0.02 mmol). The reaction was then stirred at room temperature for 48 h. After completion of the reaction, hexane (2.0 mL) was added and stirred for 10 minutes, the catalyst was isolated via centrifugation, and thoroughly washed with hexane (4 times). The combined organic phase was evaporated under vacuum. The corresponding products were obtained by column chromatography with ethyl

acetate/petroleum ether as eluent.

## 1.5 Optimization of the Reaction Conditions.

**Table S1.** Optimization of the Reaction Conditions for the Asymmetric Diels–Alder Reaction Catalyzed by **Mac-CP**.<sup>a</sup>

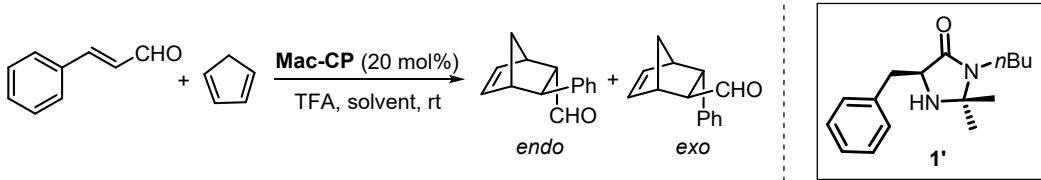

| Entry                | Solvent                                         | Yield (%) <sup>b</sup> | <i>exo/endo</i> <sup>c</sup> | <i>exo</i> ee (%) <sup>d</sup> | <i>endo</i> ee (%) <sup>d</sup> | ee |
|----------------------|-------------------------------------------------|------------------------|------------------------------|--------------------------------|---------------------------------|----|
| 1                    | CH <sub>3</sub> CN/H <sub>2</sub> O (95:5, v/v) | 71                     | 1.2/1                        | 91                             | 91                              |    |
|                      |                                                 | (89)                   | 1.0/1                        | 95                             | 94) <sup>e</sup>                |    |
|                      |                                                 | (71)                   | 2.1/1                        | 90                             | 89) <sup>f</sup>                |    |
| 2                    | CH <sub>3</sub> OH/H <sub>2</sub> O             | 46                     | 1.2/1                        | 92                             | 95                              |    |
|                      |                                                 | (74)                   | 1.8/1                        | 95                             | 93) <sup>e</sup>                |    |
| <b>3<sup>g</sup></b> | <b>CH<sub>3</sub>CN/H<sub>2</sub>O</b>          | <b>95</b>              | <b>1.2/1</b>                 | <b>92</b>                      | <b>93</b>                       |    |
| 4 <sup>g, h</sup>    | CH <sub>3</sub> CN/H <sub>2</sub> O             | 20                     | 1.3/1                        | 91                             | 94                              |    |
| 5 <sup>g, i</sup>    | CH <sub>3</sub> CN/H <sub>2</sub> O             | 80                     | 1.2/1                        | 93                             | 92                              |    |
| 6 <sup>j</sup>       | H <sub>2</sub> O                                | 91                     | 1.2/1                        | 78                             | 83                              |    |

<sup>a</sup> Unless otherwise noted, all reactions were performed on a 0.1 mmol scale using **Mac-CP** (0.02 mmol), TFA (0.02 mmol), (*E*)-cinnamaldehyde (0.1 mmol), and cyclopentadiene (0.5 mmol) at r.t. in 0.2 mL of solvent for 48 h. <sup>b</sup> Yield of the isolated product. <sup>c</sup> Determined by <sup>1</sup>H NMR spectroscopy. <sup>d</sup> The ee values were determined by HPLC with a Daicel chiral OJ-H column after reduction of the product to the corresponding alcohol with NaBH<sub>4</sub>. <sup>e</sup> Precursor **1** (20 mol%) was used as the catalyst, and the obtained results are presented in parentheses. <sup>f</sup> Precursor **1'** (20 mol%) was used as the catalyst, and the obtained results are presented in parentheses. <sup>g</sup> 50 μL of solvent was used. <sup>h</sup> 0.02 mmol of HCl was used instead of TFA as additive. <sup>i</sup> 10 mol% of **Mac-CP** and 10 mol% of TFA were used. <sup>j</sup> 0.4 mL of water was used as the solvent, and 0.02 mmol of HBF<sub>4</sub> was used instead of TFA as additive.

## 1.6 Catalytic activity at different reaction times.

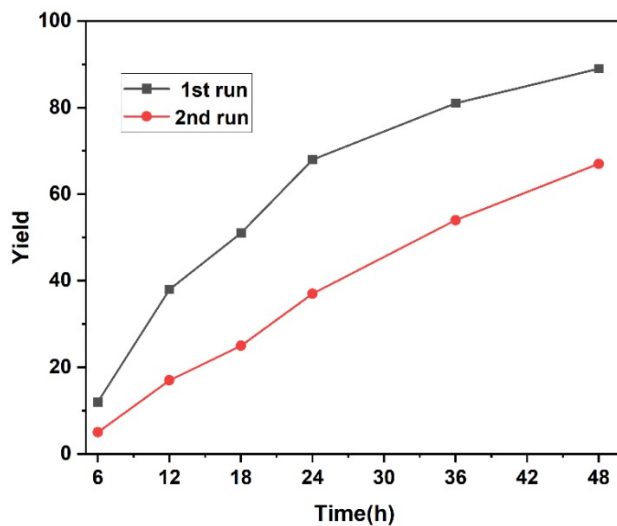

Fig. S1 Catalytic activity at different, shorter reaction times.

## 1.7 $^{13}\text{C}$ CP/MAS NMR and FT-IR spectra of recycled Mac-CP catalyst.

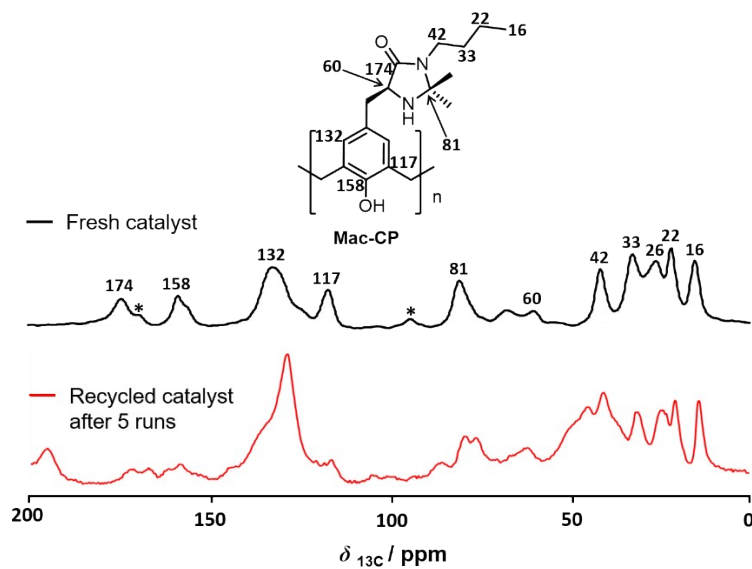

Fig. S2  $^{13}\text{C}$  CP/MAS NMR spectra of fresh (black) and recycled Mac-CP catalyst after 5 times of catalytic reactions (red).

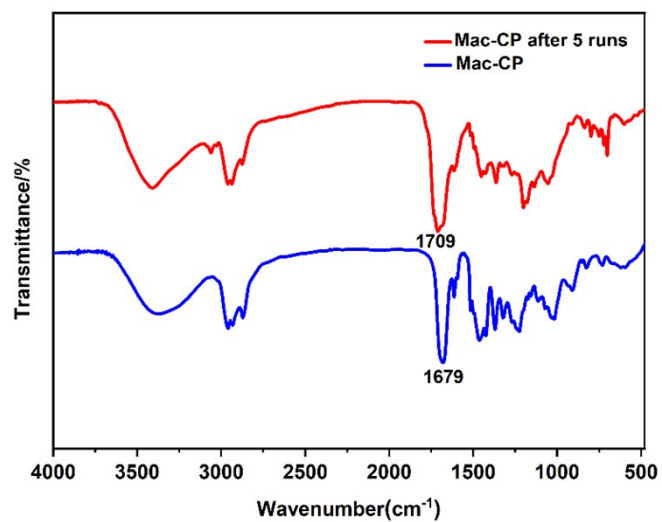

**Fig. S3** FT-IR spectra of fresh (black) and recycled **Mac-CP** catalyst after 5 times of catalytic reactions (red).

## 1.8 Product Data.

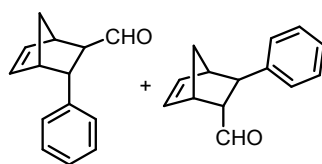

**3-Phenylbicyclo[2.2.1]hept-5-ene-2-carbaldehyde.** The product was obtained in 95% yield. Colourless liquid, *exo/endo* = 1.15/1.0. The Product was converted to the corresponding alcohol with NaBH<sub>4</sub>, and the enantiomers were separated by HPLC using a Chiralcel OJ-H column (70/30 hexane/*i*-PrOH; flow rate 1.0 mL/min; *exo* 92% ee, *endo* 93% ee): *endo* isomer (*t<sub>R</sub>* (major) = 19.9 min, *t<sub>R</sub>* (minor) = 9.2 min), *exo* isomer (*t<sub>R</sub>* (major) = 33.8 min, *t<sub>R</sub>* (minor) = 25.1 min). <sup>1</sup>H NMR (400 MHz, CDCl<sub>3</sub>) *exo* isomer:  $\delta$  9.91 (d, *J* = 2.0 Hz, 1H), 7.31-7.13 (m, 5H), 6.33 (dd, *J* = 5.4, 3.2 Hz, 1H), 6.07 (dd, *J* = 5.6, 2.8 Hz, 1H), 3.73-3.71 (m, 1H), 3.22-3.21 (m, 2H), 2.60-2.58 (m, 1H), 1.63-1.61 (m, 1H), 1.60-1.56 (m, 1H); *endo* isomer:  $\delta$  9.59 (d, *J* = 2.0 Hz, 1H), 7.31-7.13 (m, 5H), 6.41 (dd, *J* = 5.6, 3.2 Hz, 1H), 6.17 (dd, *J* = 5.6, 2.8 Hz, 1H), 3.33 (s, 1H), 3.12-3.08 (m, 2H), 2.98-2.97 (m, 1H), 1.82-1.79 (m, 1H), 1.63-1.60 (m, 1H); <sup>13</sup>C NMR (100 MHz, CDCl<sub>3</sub>): (two isomers)  $\delta$  203.4, 202.7, 143.5, 142.5, 139.2, 136.5, 136.2, 133.7, 128.5, 128.1, 127.8, 127.3, 126.3, 126.1, 60.8, 59.4, 48.4, 48.3, 47.5, 47.1, 45.6, 45.44, 45.38, 45.1. Spectroscopic data are in agreement with the published data.<sup>2,3</sup>

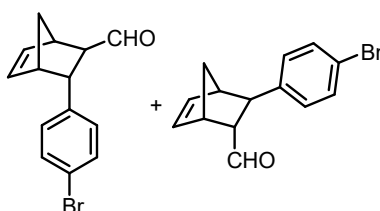

**3-(4-Bromophenyl)bicyclo[2.2.1]hept-5-ene-2-carbaldehyde.** The desired product was obtained in 97% yield. Colourless liquid, 1.15/1.0 *exo/endo*. The Product was converted to the corresponding alcohol with NaBH<sub>4</sub> and enantiomers were separated by HPLC using a Chiralcel OJ-H column (70/30 hexane/*i*-PrOH; flow rate 1.0 mL/min; *exo* 91% ee, *endo* 84% ee, *endo* isomer (*t<sub>R</sub>* (major) = 9.5 min, *t<sub>R</sub>* (minor) = 4.9 min), *exo* isomer (*t<sub>R</sub>* (major) = 12.7 min, *t<sub>R</sub>* (minor) = 5.6 min). <sup>1</sup>H NMR (400 MHz, CDCl<sub>3</sub>) *exo* isomer:  $\delta$  9.90 (d, *J* = 1.92 Hz, 1H), 7.36 (d, *J* = 8.4 Hz, 2H), 7.01 (d, *J* = 8.4 Hz, 2H), 6.35 (dd, *J* = 5.6, 3.2 Hz, 1H), 6.04 (dd, *J* = 5.6, 2.8 Hz, 1H), 3.69 (t, *J* = 4.4 Hz, 1H), 3.24-3.18 (m, 2H), 2.54-2.53 (m, 1H), 1.58-1.57 (m, 2H); *endo* isomer:  $\delta$  9.59 (d, *J* = 2.0 Hz, 1H), 7.42 (d, *J* = 8.8 Hz, 2H), 7.14 (d, *J* = 8.4 Hz, 2H),

6.41 (dd,  $J = 5.6, 3.2$  Hz, 1H), 6.17 (dd,  $J = 5.6, 2.8$  Hz, 1H), 3.35 (s, 1H), 3.09-3.04 (m, 2H), 2.93-2.91 (m, 1H), 1.75 (d,  $J = 8.8$  Hz, 1H), 1.65-1.62 (m, 1H);  $^{13}\text{C}$  NMR (100 MHz,  $\text{CDCl}_3$ ): (two isomers)  $\delta$  203.0, 202.3, 142.6, 141.6, 139.1, 136.5, 136.2, 133.8, 131.6, 131.1, 129.6, 129.1, 120.1, 119.9, 61.0, 59.5, 48.3, 48.1, 47.5, 47.0, 45.4, 45.1, 45.0, 44.7. Spectroscopic data are in agreement with the published data.<sup>3-5</sup>

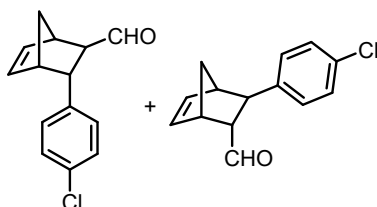

**3-(4-Chlorophenyl)bicyclo[2.2.1]hept-5-ene-2-carbaldehyde.** The desired product was obtained in 90% yield. Colourless liquid, 1.16/1.0 *exo/endo*. The Product was converted to the corresponding alcohol with  $\text{NaBH}_4$  and enantiomers were separated by HPLC using a Chiralcel OJ-H column (80/20 hexane/*i*-PrOH; flow rate 1.0 mL/min; *exo* 90% ee, *endo* 88% ee, *endo* isomer ( $t_{\text{R}}$  (major) = 10.7 min,  $t_{\text{R}}$  (minor) = 5.2 min), *exo* isomer ( $t_{\text{R}}$  (major) = 16.1 min,  $t_{\text{R}}$  (minor) = 6.3 min).  $^1\text{H}$  NMR (400 MHz,  $\text{CDCl}_3$ ) ***exo*** isomer:  $\delta$  9.90 (d,  $J = 2.0$  Hz, 1H), 7.23-7.15 (m, 2H), 7.07 (d,  $J = 8.4$  Hz, 2H), 6.35 (dd,  $J = 5.2, 3.2$  Hz, 1H), 6.05 (dd,  $J = 5.6, 2.8$  Hz, 1H), 3.71 (t,  $J = 4.2$  Hz, 1H), 3.23-3.18 (m, 1H), 3.10-3.05 (m, 1H), 2.55-2.53 (m, 1H), 1.58-1.57 (m, 2H); ***endo*** isomer:  $\delta$  9.59 (d,  $J = 2.0$  Hz, 1H), 7.26-7.18 (m, 4H), 6.41 (dd,  $J = 5.6, 3.2$  Hz, 1H), 6.17 (dd,  $J = 5.6, 2.8$  Hz, 1H), 3.35 (s, 1H), 3.23-3.18 (m, 2H), 2.93-2.92 (m, 1H), 1.76 (d,  $J = 8.8$  Hz, 1H), 1.65-1.57 (m, 1H);  $^{13}\text{C}$  NMR (100 MHz,  $\text{CDCl}_3$ ): (two isomers)  $\delta$  203.0, 202.3, 142.1, 141.1, 139.1, 136.5, 136.3, 133.7, 132.1, 131.9, 129.2, 128.7, 128.6, 128.2, 61.0, 59.6, 48.4, 48.2, 47.5, 47.0, 45.4, 45.1, 45.0, 44.7. Spectroscopic data are in agreement with the published data.<sup>3a,6,7</sup>

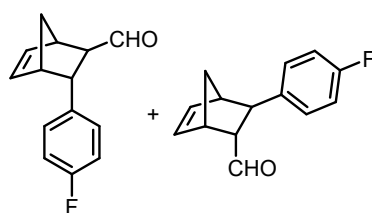

**3-(4-Fluorophenyl) bicyclo [2.2.1] hept-5-ene-2-carbaldehyde.** The desired product was obtained in 81% yield. Colourless liquid, 1.18/1.0 *exo/endo*. The Product was converted to the corresponding alcohol with  $\text{NaBH}_4$  and enantiomers were separated by HPLC using a Chiralcel OJ-H column (95/5 hexane/*i*-PrOH; flow rate 1.0 mL/min; *exo* 89% ee, *endo* 90% ee, *endo* isomer ( $t_{\text{R}}$  (major) = 43.3 min,  $t_{\text{R}}$  (minor) = 14.1 min), *exo* isomer ( $t_{\text{R}}$  (major) = 65.0 min,  $t_{\text{R}}$  (minor) = 25.2 min).  $^1\text{H}$  NMR (400 MHz,



CDCl<sub>3</sub>) *exo* isomer:  $\delta$  9.90 (d,  $J$  = 2.0 Hz, 1H), 7.08-7.11 (m, 2H), 6.90-6.96 (m, 2H), 6.35 (dd,  $J$  = 5.6, 3.2 Hz, 1H), 6.05 (dd,  $J$  = 5.6, 2.8 Hz, 1H), 3.70 (t,  $J$  = 4.2 Hz, 1H), 3.18-3.23 (m, 2H), 2.53 (dt,  $J$  = 5.2, 1.8 Hz, 1H), 1.55-1.65 (m, 2H); *endo* isomer:  $\delta$  9.59 (d,  $J$  = 2.0 Hz, 1H), 7.20-7.23 (m, 2H), 6.97-7.02 (m, 2H), 6.41 (dd,  $J$  = 5.6, 3.2 Hz, 1H), 6.17 (dd,  $J$  = 5.8, 2.6 Hz, 1H), 3.34 (s, 1H), 3.05-3.09 (m, 2H), 2.90-2.93 (m, 1H), 1.79-1.64 (m, 2H); <sup>13</sup>C NMR (100 MHz, CDCl<sub>3</sub>): (two isomers)  $\delta$  203.2, 202.5, 162.7, 162.5, 160.2, 160.1, 139.2, 138.22, 138.19, 136.4, 136.3, 133.7, 129.23, 129.15, 128.73, 128.66, 115.4, 115.2, 115.0, 114.8, 61.1, 59.7, 48.5, 48.4, 47.6, 47.0, 45.5, 45.1, 45.0, 44.6; HRMS (ESI) calcd for C<sub>14</sub>H<sub>13</sub>FONa [M+Na]<sup>+</sup> 239.0843, found 239.0839. Spectroscopic data are in agreement with the published data.<sup>3b</sup>

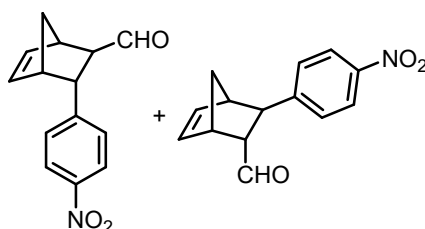

**3-(4-Nitrophenylbicyclo[2,2,1]hept-5-ene-2-carboxaldehyde.** Prepared according to the general procedure using *trans*-3-(4-nitrophenyl)acrylaldehyde (17.7 mg, 0.1 mmol) and cyclopentadiene (0.042 mL, 0.5 mmol) in CH<sub>3</sub>NO<sub>2</sub>/H<sub>2</sub>O (0.05 mL, 95/5 v/v), the desired product was obtained in 82% yield. Colourless liquid, 1.54/1.0 *exo/endo*. The enantiomeric excess was determined by reduction of the formyl group followed by conversion of the resulting alcohol to the benzoyl ester (3.0 eq Et<sub>3</sub>N, 0.1 eq DMAP and 1.1 eq BzCl, CH<sub>2</sub>Cl<sub>2</sub> (0.2 M)) and HPLC analysis. Enantiomers were separated by HPLC using a Chiralcel OD-H column (96/4 hexane/*i*-PrOH; flow rate 1.0 mL/min; *exo* 88% ee, *endo* 90% ee, *endo* isomer ( $t_R$  (major) = 19.8 min,  $t_R$  (minor) = 14.9 min), *exo* isomer ( $t_R$  (major) = 23.9 min,  $t_R$  (minor) = 17.9 min). <sup>1</sup>H NMR (400 MHz, CDCl<sub>3</sub>) *exo* isomer:  $\delta$  9.92 (d,  $J$  = 1.6 Hz, 1H), 8.12-8.10 (m, 2H), 7.31-7.29 (m, 2H), 6.41 (dd,  $J$  = 5.6, 3.2 Hz, 1H), 6.05 (dd,  $J$  = 5.6, 2.8 Hz, 1H), 3.90-3.87 (m, 1H), 3.30 (s, 1H), 3.25 (s, 1H), 2.62 (d,  $J$  = 4.4 Hz, 1H), 1.62 (s, 2H); *endo* isomer:  $\delta$  9.64 (d,  $J$  = 1.6 Hz, 1H), 8.18-8.16 (m, 2H), 7.44-7.42 (m, 2H), 6.44 (dd,  $J$  = 5.6, 3.2 Hz, 1H), 6.20 (dd,  $J$  = 5.8, 2.6 Hz, 1H), 3.43 (s, 1H), 3.22-3.19 (m, 2H), 2.97-2.94 (m, 1H), 1.78-1.69 (m, 2H); <sup>13</sup>C NMR (100 MHz, CDCl<sub>3</sub>): (two isomers)  $\delta$  202.1, 201.5, 151.6, 150.5, 146.5, 146.4, 139.1, 136.9, 136.0, 133.9, 128.7, 128.2, 123.8, 123.4, 61.2, 59.6, 48.4, 47.9, 47.6, 47.1, 45.53, 45.45, 45.1, 45.0. Spectroscopic data are in agreement with the published data.<sup>5</sup>

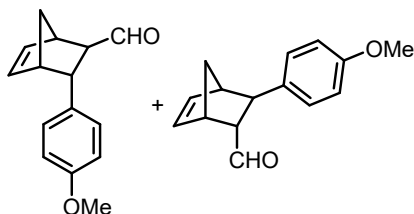

**3-(4-Methoxyphenyl)bicyclo[2,2,1]hept-5-ene-2-carboxaldehyde.** Prepared according to the general procedure using *trans*-3-(4-methoxyphenyl)acrylaldehyde (16.2 mg, 0.1 mmol) and cyclopentadiene (0.042 mL, 0.5 mmol) in CH<sub>3</sub>NO<sub>2</sub>/H<sub>2</sub>O (0.05 mL, 95/5 v/v), the desired product was obtained in 86% yield. Colourless liquid, 1.28/1.0 *exo/endo*. The Product was converted to the corresponding alcohol with NaBH<sub>4</sub> and enantiomers were separated by HPLC using a Chiralcel OJ-H column (70/30 hexane/*i*-PrOH; flow rate 1.0 mL/min; *exo* 85% ee, *endo* 92% ee, *endo* isomer ( $t_R$  (major) = 32.7 min,  $t_R$  (minor) = 8.2 min), *exo* isomer ( $t_R$  (major) = 22.8 min,  $t_R$  (minor) = 11.7 min). <sup>1</sup>H NMR (400 MHz, CDCl<sub>3</sub>) ***exo*** isomer:  $\delta$  9.91 (d,  $J$  = 2.1 Hz, 1H), 7.08-7.06 (m, 2H), 6.80-6.78 (m, 2H), 6.34 (dd,  $J$  = 5.6, 3.2 Hz, 1H), 6.07 (dd,  $J$  = 5.6, 2.8 Hz, 1H), 3.77 (s, 3H), 3.66 (dd,  $J$  = 4.8, 4.0 Hz, 1H), 3.21 and 3.17 (two brs, 2H), 2.54-2.53 (m, 1H), 1.60 (brd,  $J$  = 9.0 Hz, 1H), 1.54 (dd,  $J$  = 9.0, 1.5 Hz, 1H); ***endo*** isomer:  $\delta$  9.58 (d,  $J$  = 2.3 Hz, 1H), 7.20-7.17 (m, 2H), 6.86-6.84 (m, 2H), 6.41 (dd,  $J$  = 5.6, 3.2 Hz, 1H), 6.16 (dd,  $J$  = 5.6, 2.8 Hz, 1H), 3.79 (s, 3H), 3.32 (s, 1H), 3.06 (s, 1H), 3.02 (d,  $J$  = 4.4 Hz, 1H), 2.95-2.92 (m, 1H), 1.79 (d,  $J$  = 8.8 Hz, 1H), 1.62 (brd,  $J$  = 8.5 Hz, 1H); <sup>13</sup>C NMR (100 MHz, CDCl<sub>3</sub>): (two isomers)  $\delta$  203.7, 202.9, 158.1, 158.0, 139.2, 136.5, 136.3, 135.5, 134.6, 133.7, 128.8, 128.3, 113.9, 113.5, 60.9, 59.7, 55.3, 55.2, 48.7, 48.6, 47.6, 47.1, 45.5, 45.1, 45.0, 44.7. Spectroscopic data are in agreement with the published data.<sup>3,5</sup>

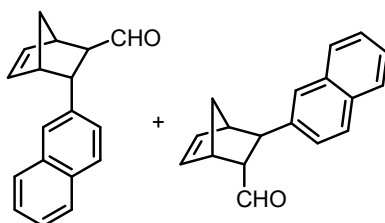

**3-(Naphthalen-2-yl)bicyclo[2.2.1]hept-5-ene-2-carbaldehyde.** Prepared according to the general procedure using *trans*-3-(naphthalen-1-yl)acrylaldehyde (18.2 mg, 0.1 mmol) and cyclopentadiene (0.042 mL, 0.5 mmol) in CH<sub>3</sub>CN/H<sub>2</sub>O (0.1 mL, 95/5 v/v), the desired product was obtained in 86% yield. Colourless liquid, 1.32/1.0 *exo/endo*. The Product was converted to the corresponding alcohol with NaBH<sub>4</sub> and enantiomers

were separated by HPLC using a Chiralcel OJ-H column (95/5 hexane/*i*-PrOH; flow rate 1.0 mL/min; *exo* 92% ee, *endo* 94% ee, *endo* isomer ( $t_R$  (major) = 63.9 min,  $t_R$  (minor) = 34.6 min), *exo* isomer ( $t_R$  (major) = 108.4 min,  $t_R$  (minor) = 49.5 min).  $^1\text{H}$  NMR (400 MHz,  $\text{CDCl}_3$ ) *exo* isomer:  $\delta$  9.96 (d,  $J = 2.0$  Hz, 1H), 7.81-7.72 (m, 3H), 7.54 (brs, 1H), 7.47-7.37 (m, 2H), 7.30 (dd,  $J = 8.4, 2.0$  Hz, 1H), 6.37 (dd,  $J = 5.6, 3.2$  Hz, 1H), 6.08 (dd,  $J = 5.6, 2.8$  Hz, 1H), 3.89 (t,  $J = 4.2$  Hz, 1H), 3.31 and 3.26 (two brs, 2H), 2.74-2.72 (m, 1H), 1.65 (brd,  $J = 8.5$  Hz, 1H), 1.61 (dd,  $J = 8.5, 1.5$  Hz, 1H); *endo* isomer:  $\delta$  9.65 (d,  $J = 2.4$  Hz, 1H), 7.81-7.72 (m, 3H), 7.68 (brs, 1H), 7.47-7.37 (m, 3H), 6.46 (dd,  $J = 5.6, 3.6$  Hz, 1H), 6.20 (dd,  $J = 5.6, 2.8$  Hz, 1H), 3.38 (s, 1H), 3.31 and 3.26 (two brs, 2H), 3.09-3.06 (m, 1H), 1.88 (d,  $J = 8.4$  Hz, 1H), 1.66-1.65 (m, 1H);  $^{13}\text{C}$  NMR (100 MHz,  $\text{CDCl}_3$ ): (two isomers)  $\delta$  203.5, 202.8, 141.1, 140.0, 139.2, 136.5, 136.3, 133.8, 133.5, 133.2, 132.1, 132.0, 128.2, 127.7, 127.63, 127.59, 127.51, 127.47, 126.8, 126.6, 126.1, 126.0, 125.9, 125.5, 125.4, 124.7, 60.8, 59.2, 48.5, 48.2, 47.6, 47.2, 45.8, 45.54, 45.48, 45.2. Spectroscopic data are in agreement with the published data.<sup>5</sup>

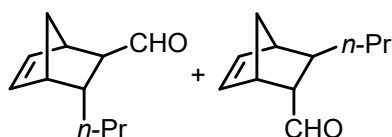

**3-Propylbicyclo[2.2.1]hept-5-ene-2-carbaldehyde.** The desired product was obtained in 88% yield. Colourless liquid, 1.0/1.08 *exo/endo*. The Product was converted to the corresponding phenyl hydrazone derivatives with 2,4-dinitrophenylhydrazine and enantiomers were separated by HPLC using a Chiralcel OJ-H column (97/3 hexane/*i*-PrOH, flow rate 0.5 mL/min, *endo* 91% ee, *endo* isomer ( $t_R$  (major) = 67.8 min,  $t_R$  (minor) = 77.5 min); 87/13 hexane/*i*-PrOH, flow rate 1.0 mL/min, *exo* 81% ee, *exo* isomer ( $t_R$  (major) = 19.9 min,  $t_R$  (minor) = 31.7 min).  $^1\text{H}$  NMR (400 MHz,  $\text{CDCl}_3$ ) *exo* isomer:  $\delta$  9.78 (d,  $J = 2.8$  Hz, 1H), 6.21 (dd,  $J = 5.6, 3.2$  Hz, 1H), 6.13 (dd,  $J = 5.6, 3.2$  Hz, 1H), 3.02 (s, 1H), 2.87 (s, 1H), 1.77-1.75 (m, 2H), 1.49-1.18 (m, 6H), 0.86 (t,  $J = 7.2$  Hz, 3H); *endo* isomer:  $\delta$  9.37 (d,  $J = 3.6$  Hz, 1H), 6.28 (dd,  $J = 5.6, 3.2$  Hz, 1H), 6.06 (dd,  $J = 5.8, 2.6$  Hz, 1H), 3.12 (s, 1H), 2.66 (s, 1H), 2.38-2.37 (m, 2H), 1.55-1.18 (m, 6H), 0.91 (t,  $J = 7.2$  Hz, 3H);  $^{13}\text{C}$  NMR (100 MHz,  $\text{CDCl}_3$ ): (two isomers)  $\delta$  205.1, 204.1, 138.8, 136.1, 135.9, 132.8, 60.0, 58.8, 47.2, 47.0, 46.5, 45.7, 45.1, 44.8, 41.9, 41.6, 38.0, 36.4, 21.6, 21.5, 14.2. Spectroscopic data are in agreement with the published data.<sup>2,8</sup>

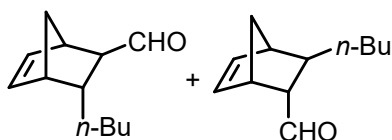

**3-Butylbicyclo[2.2.1]hept-5-ene-2-carbaldehyde.** The desired product was obtained in 83% yield. Colourless liquid, 1.0/1.04 *exo/endo*. The Product was converted to the corresponding phenyl hydrazone derivatives with 2,4-dinitrophenylhydrazine and enantiomers were separated by HPLC using a Chiralcel OJ-H column (99/1 hexane/*i*-PrOH, flow rate 0.5 mL/min, *endo* 89% ee, *endo* isomer ( $t_R$  (major) = 124.0 min,  $t_R$  (minor) = 112.8 min); 95/5 hexane/*i*-PrOH, flow rate 1.0 mL/min, *exo* 71% ee, *exo* isomer ( $t_R$  (major) = 28.4 min,  $t_R$  (minor) = 41.5 min).  $^1\text{H}$  NMR (400 MHz,  $\text{CDCl}_3$ ) *exo* isomer:  $\delta$  9.78 (d,  $J = 2.8$  Hz, 1H), 6.21 (dd,  $J = 5.6, 3.2$  Hz, 1H), 6.14 (dd,  $J = 5.6, 2.8$  Hz, 1H), 3.02 (s, 1H), 2.88 (s, 1H), 2.29-2.23 (m, 1H), 1.77-1.75 (m, 1H), 1.49-1.17 (m, 8H), 0.87-0.84 (m, 3H); *endo* isomer:  $\delta$  9.37 (d,  $J = 3.6$  Hz, 1H), 6.27 (dd,  $J = 5.6, 3.2$  Hz, 1H), 6.06 (dd,  $J = 6.0, 2.8$  Hz, 1H), 3.12 (s, 1H), 2.67 (s, 1H), 2.37 (q,  $J = 3.6$  Hz, 1H), 1.69-1.64 (m, 1H), 1.49-1.17 (m, 8H), 0.91-0.89 (m, 3H);  $^{13}\text{C}$  NMR (100 MHz,  $\text{CDCl}_3$ ): (two isomers)  $\delta$  205.2, 204.1, 138.8, 136.1, 135.9, 132.8, 60.0, 58.8, 47.2, 47.0, 46.5, 45.7, 45.1, 44.9, 42.1, 41.8, 35.5, 33.9, 30.7, 30.6, 22.8, 22.7, 14.0. Spectroscopic data are in agreement with the published data.<sup>4</sup>

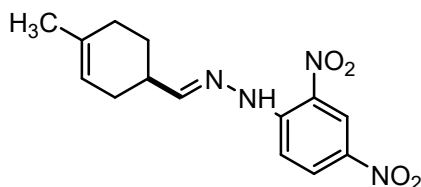

**(*R,E*)-1-(2,4-dinitrophenyl)-2-((4-methylcyclohex-3-en-1-yl)methylene)hydrazine.**

The product was obtained in 94% yield. The enantiomers were separated by HPLC using a Chiralcel AS-H column (90/10 hexane/*i*-PrOH; flow rate 1.0 mL/min; 65% ee): enantiomer ( $t_R$  (major) = 14.5 min,  $t_R$  (minor) = 15.1 min).  $^1\text{H}$  NMR (400 MHz,  $\text{CDCl}_3$ )  $\delta$  10.98 (s, 1H), 9.10 (d,  $J = 2.6$  Hz, 1H), 8.28 (dd,  $J = 9.6, 2.6$  Hz, 1H), 7.91 (s, 1H), 7.49 (d,  $J = 5.2$  Hz, 1H), 5.46–5.38 (m, 1H), 2.62 (d,  $J = 5.3$  Hz, 1H), 2.35–2.01 (m, 4H), 2.02–1.93 (m, 1H), 1.67 (d,  $J = 2.0$  Hz, 3H), 1.66–1.58 (m, 1H);  $^{13}\text{C}$  NMR (101 MHz,  $\text{CDCl}_3$ )  $\delta$  155.7, 145.2, 134.3, 130.0, 123.5, 119.0, 116.6, 36.8, 28.9, 28.61, 26.4, 23.6.

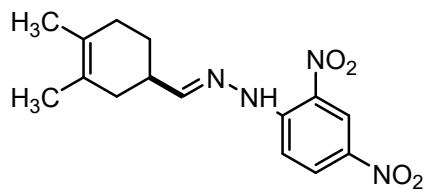

***(R,E)***-1-((3,4-dimethylcyclohex-3-en-1-yl)methylene)-2-(2,4-dinitrophenyl) hydrazine. The product was obtained in 85% yield. The enantiomers were separated by HPLC using a Chiralcel AS-H column (90/10 hexane/*i*-PrOH; flow rate 1.0 mL/min; 69% ee): enantiomer ( $t_R$  (major) = 11.3 min,  $t_R$  (minor) = 12.4 min).  $^1\text{H}$  NMR (400 MHz,  $\text{CDCl}_3$ )  $\delta$  10.98 (s, 1H), 9.09 (d,  $J = 2.6$  Hz, 1H), 8.26 (d,  $J = 2.5$  Hz, 1H), 7.91 (s, 1H), 7.49 (d,  $J = 5.2$  Hz, 1H), 2.70–2.59 (m, 1H), 2.12 (s, 4H), 1.93 (ddt,  $J = 12.7, 7.1, 4.0$  Hz, 1H), 1.65 (s, 6H), 1.57 (d,  $J = 12.8$  Hz, 1H);  $^{13}\text{C}$  NMR (101 MHz,  $\text{CDCl}_3$ )  $\delta$  155.8, 145.2, 137.7, 130.0, 128.8, 125.8, 123.7, 123.5, 116.6, 37.8, 34.7, 30.6, 26.8, 19.2, 19.0.

**Table S2.** Comparison of Catalytic Efficiency and Enantioselectivity for the Asymmetric Diels–Alder Reaction of (*E*)-Cinnamaldehyde and Cyclopentadiene with Various Recoverable MacMillan Catalysts.

| Catalyst                      | Yield (%) | <i>exo/endo</i> | <i>exo</i> ee (%) | <i>endo</i> ee (%) | Ref.      |
|-------------------------------|-----------|-----------------|-------------------|--------------------|-----------|
| PEG-supported Mac             | 67        | 1/15.7          | 86                | 92                 | 9         |
| Polymer-supported Mac         | 70        | 1.2/1           | 99                | 99                 | 10        |
| MCF-supported Mac             | 93        | 1.3/1           | 83                | 87                 | 11        |
| Mac-SILC                      | 67        | 1/1.1           | 92                | 95                 | 12        |
| Polymer-supported Mac         | 92        | 1.3/1           | 85                | 89                 | 13        |
| H-PhPMO-Mac                   | 98        | 1/1.1           | 81                | 81                 | 14        |
| PMHS-supported Mac            | 95        | 1.1/1           | 92                | 91                 | 15        |
| Main-chain polymeric Mac      | 92        | 1.2/1           | 91                | 95                 | 16        |
| Ionic liquid-supported Mac    | 97        | 1.3/1           | 88                | 93                 | 8         |
| Mac-ChiOSP                    | 94        | 1/1.1           | 90                | 86                 | 5         |
| SiO <sub>2</sub> -Mac         | 94        | 1.1/1           | 85                | 85                 | 17        |
| Silica-supported Mac          | 91        | 1/1.2           | 90                | 92                 | 18        |
| Polymer-supported Mac         | 75        | 1.1/1           | 91                | 92                 | 19        |
| Ionic liquid-modified Mac     | 92        | 1.2/1           | 82                | 78                 | 20        |
| Ionic liquid-supported Mac    | 90        | 1/4.6           | -                 | 66                 | 21        |
| Polymeric Mac                 | 94        | 1.5/1           | 93                | 97                 | 22        |
| POM–imidazolidinium           | 38        | 4.0/1           | 88                | 72                 | 23        |
| Main-chain polymeric Mac      | 87        | 1.1/1           | 92                | 96                 | 24        |
| Phosphonylated Mac            | 98        | 1.9/1           | 99                | 98                 | 25        |
| Main-chain polymeric Mac      | 99        | 1.5/1           | 93                | 98                 | 26        |
| Silica-supported Mac          | 65        | 1/1.1           | 82                | 78                 | 27        |
| Sulfated-Chitin-supported Mac | 91        | 1.2/1           | 91                | 93                 | 28        |
| Mac-CPOP                      | 95        | 1.2/1           | 75                | 81                 | 7         |
| Mac-CP                        | 95        | 1.2/1           | 92                | 93                 | This Work |

## 2. References

1. Riente, P.; Yadav, J.; Pericàs, M. A. *Org. Lett.* **2012**, *14*, 3668.
2. Ahrendt, K. A.; Borths, C. J.; MacMillan, D. W. C. *J. Am. Chem. Soc.* **2000**, *122*, 4243.
3. (a) Džambaski, Z.; Tzaras, D.-I.; Lee, S.; Kokotos, C. G.; Bondzic, B. P. *Adv. Synth. Catal.* **2019**, *361*, 1792; (b) He, H.; Pei, B.-J.; Chou, H.-H.; Tian, T.; Chan, W.-H.; Lee, A. W. M. *Org. Lett.* **2008**, *10*, 2421.
4. Gotoh, H.; Hayashi, Y. *Org. Lett.* **2007**, *9*, 2859.
5. Wang, C. A.; Zhang, Y.; Shi, J. Y.; Wang, W. *Chem. Asian J.* **2013**, *8*, 1110.
6. Lemay, M.; Ogilvie, W. W. *Org. Lett.* **2005**, *7*, 4141.
7. Wang, C.-A.; Li, Y.-W.; Han, Y.-F.; Zhang, J.-P.; Wu, R.-T.; He, G.-F. *Polym. Chem.* **2017**, *8*, 5561.
8. Shen, Z.-L.; Cheong, H.-L.; Lai, Y.-C.; Loo, W.-Y.; Loh, T.-P. *Green Chem.* **2012**, *14*, 2626.
9. Benaglia, M.; Celentano, G.; Cinquini, M.; Puglisi, A.; Cozzi, F. *Adv. Synth. Catal.* **2002**, *344*, 149.
10. Selkala, S. A.; Tois, J.; Pihko, P. M.; Koskinen, A. M. P. *Adv. Synth. Catal.* **2002**, *344*, 941.
11. Zhang, Y.; Zhao, L.; Lee, S. S.; Ying, J. Y. *Adv. Synth. Catal.* **2006**, *348*, 2027.
12. Hagiwara, H.; Kuroda, T.; Hoshi, T.; Suzuki, T. *Adv. Synth. Catal.* **2010**, *352*, 909.
13. Guizzetti, S.; Benaglia, M.; Siegel, J. S. *J. Org. Chem.* **2010**, *75*, 1620.
14. Shi, J. Y.; Wang, C. A.; Li, Z. J.; Wang, Q.; Zhang, Y.; Wang, W. *Chem. Eur. J.* **2011**, *17*, 6206.
15. Guizzetti, S.; Benaglia, M.; Siegel, J. S. *Chem. Commun.* **2012**, *48*, 3188.
16. Haraguchi, N.; Kiyono, H.; Takemura, Y.; Itsuno, S. *Chem. Commun.* **2012**, *48*, 4011.
17. Chirolì, V.; Benaglia, M.; Cozzi, F.; Puglisi, A.; Annunziata, R.; Celentano, G. *Org. Lett.* **2013**, *15*, 3590.
18. Puglisi, A.; Benaglia, M.; Annunziata, R.; Chirolì, V.; Porta, R.; Gervasini, A. *J. Org. Chem.* **2013**, *78*, 11326.
19. Chirolì, V.; Benaglia, M.; Puglisi, A.; Porta, R.; Jumde, R. P.; Mandoli, A. *Green Chem.* **2014**, *16*, 2798.
20. Chauhan, M. S.; Kumar, P.; Singh, S. *RSC Adv.* **2015**, *5*, 52636.
21. De Nino, A.; Maiuolo, L.; Merino, P.; Nardi, M.; Procopio, A.; Roca-López, D.;

- Russo, B.; Algieri, V. *ChemCatChem* **2015**, *7*, 830.
22. Itsuno, S.; Oonami, T.; Takenaka, N.; Haraguchi, N. *Adv. Synth. Catal.* **2015**, *357*, 3995.
23. Xuan, W.-J.; Botuha, C.; Hasenknopf, B.; Thorimbert, S. *Chem. Eur. J.* **2015**, *21*, 16512.
24. Haraguchi, N.; Nguyen, T. L.; Itsuno, S. *ChemCatChem* **2017**, *9*, 3786.
25. Qiao, S.; Mo, J.; Wilcox, C. B.; Jiang, B.; Li, G. *Org. Biomol. Chem.* **2017**, *15*, 1718.
26. Haraguchi, N.; Takenaka, N.; Najwa, A.; Takahara, Y.; Mun, M. K.; Itsuno, S. *Adv. Syn. Cat.* **2018**, *360*, 112.
27. de Oliveira, P. H. R.; da S. Santos, B. M.; Leão, R. A. C.; Miranda, L. S. M.; San Gil, R. A. S.; de Souza, R. O. M. A.; Finelli, F. G. *ChemCatChem* **2019**, *11*, 5553.
28. Watanabe, M.; Sakai, T.; Oka, M.; Makinose, Y.; Miyazaki, H.; Iida, H. *Adv. Syn. Cat.* **2020**, *362*, 255.



### 3. Copies of $^1\text{H}$ and $^{13}\text{C}$ NMR spectra

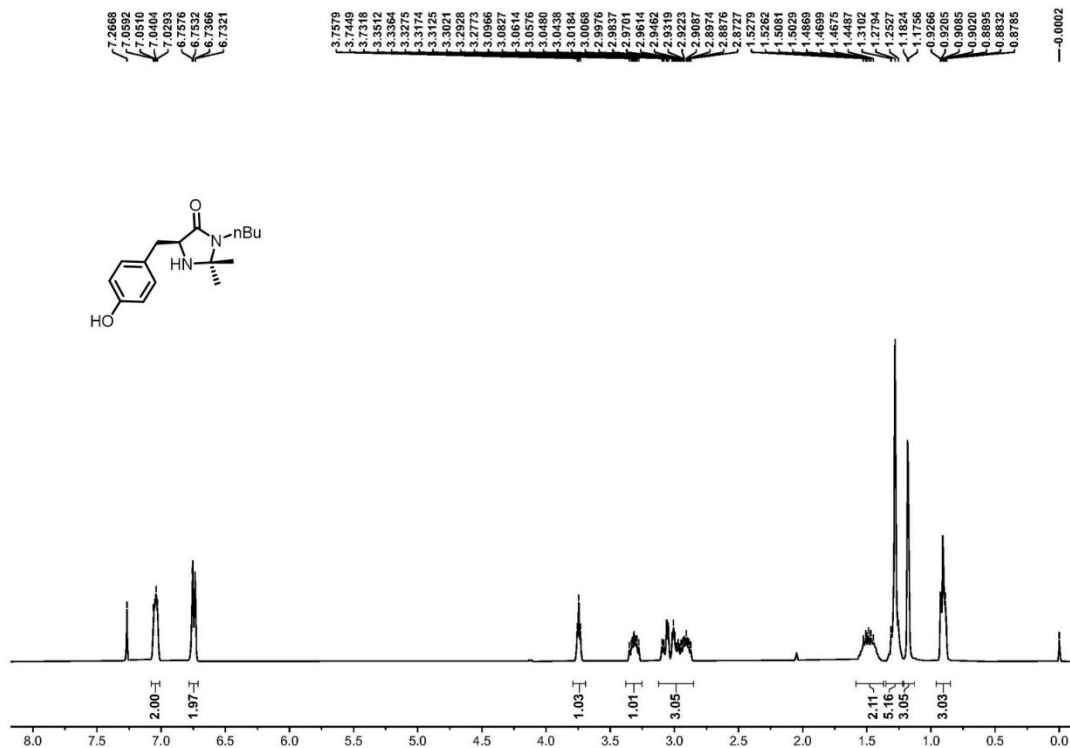

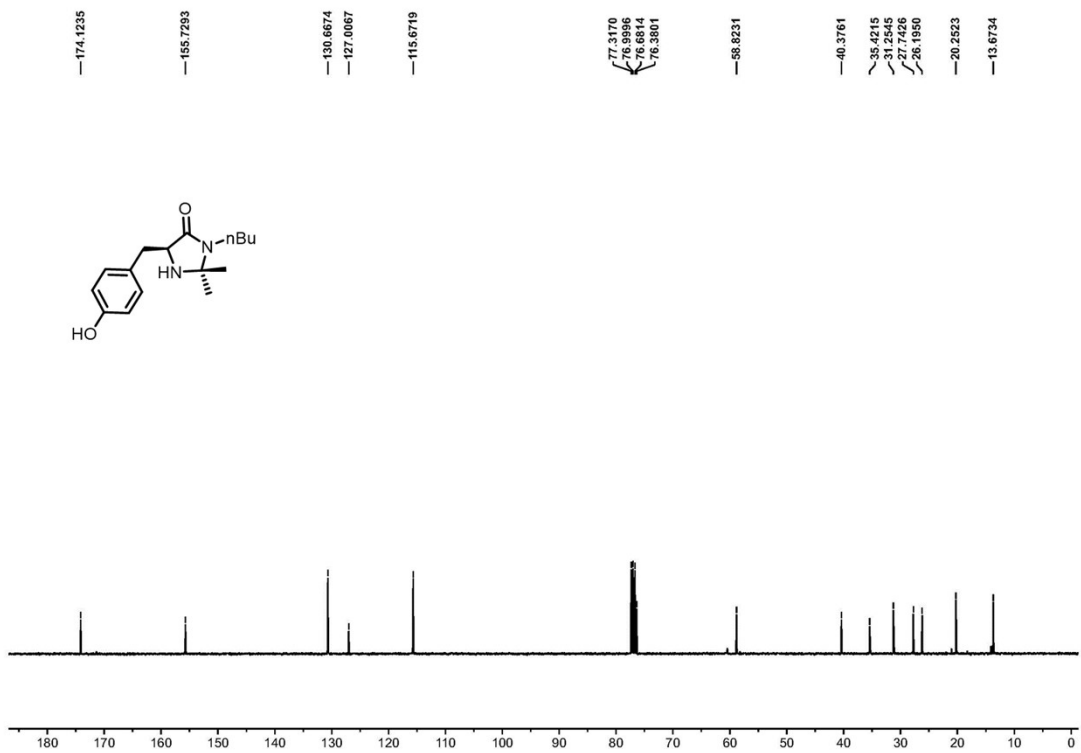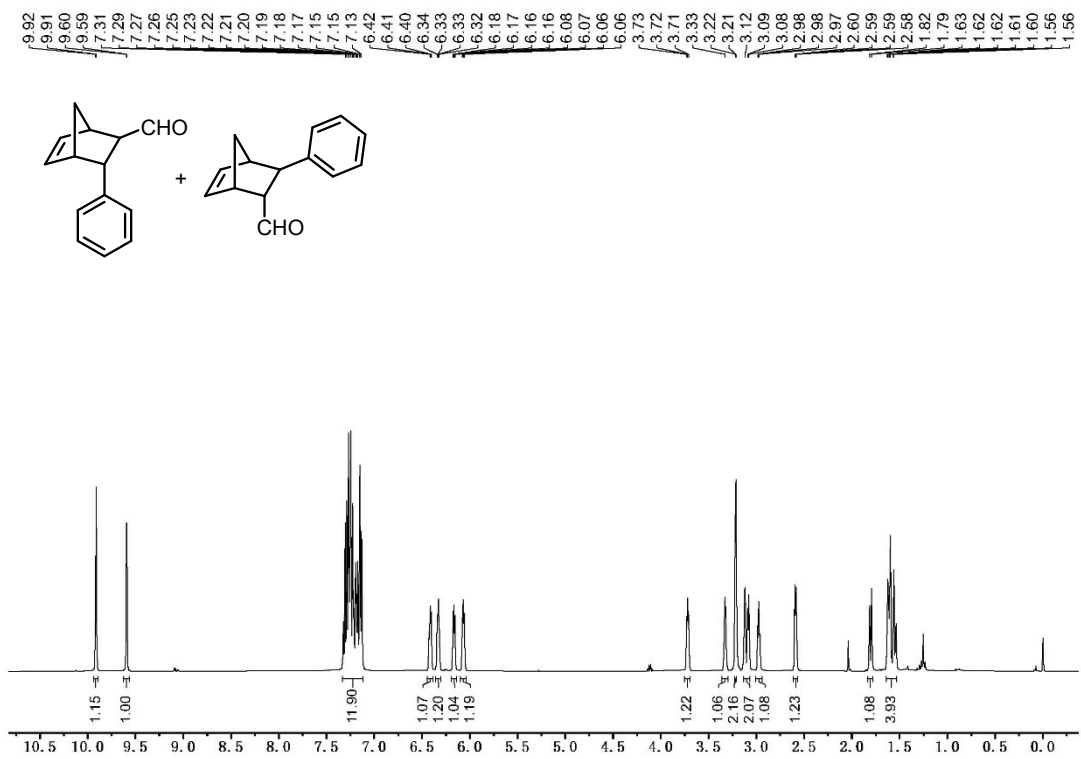

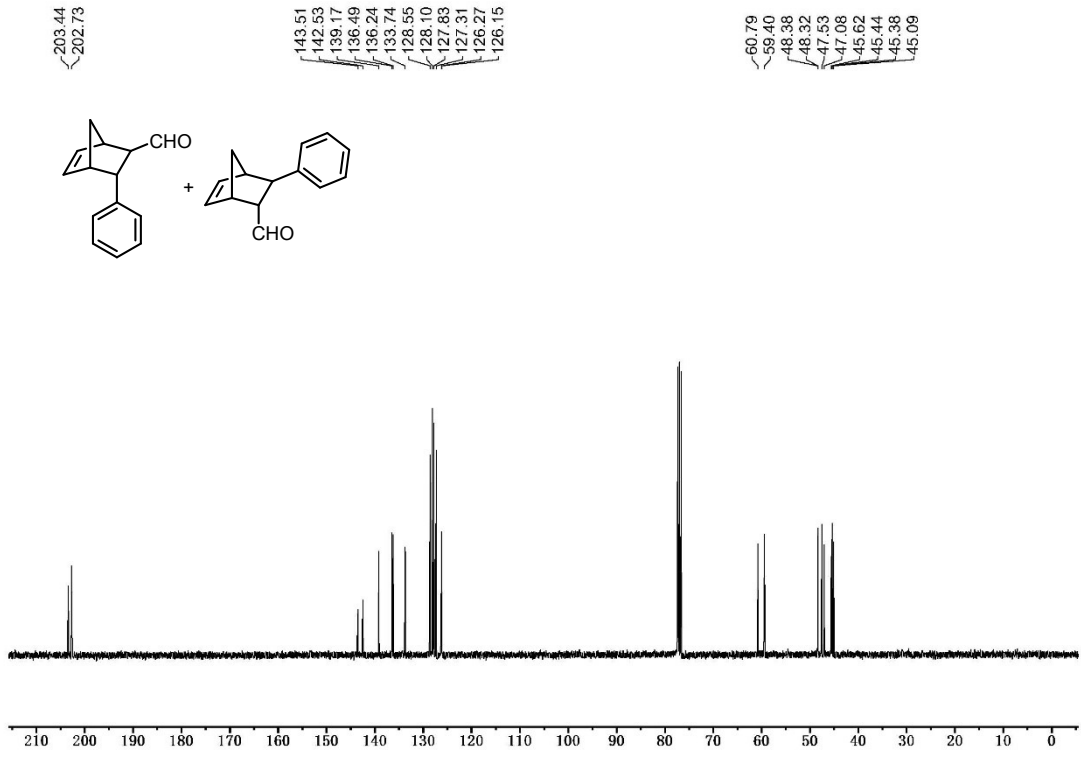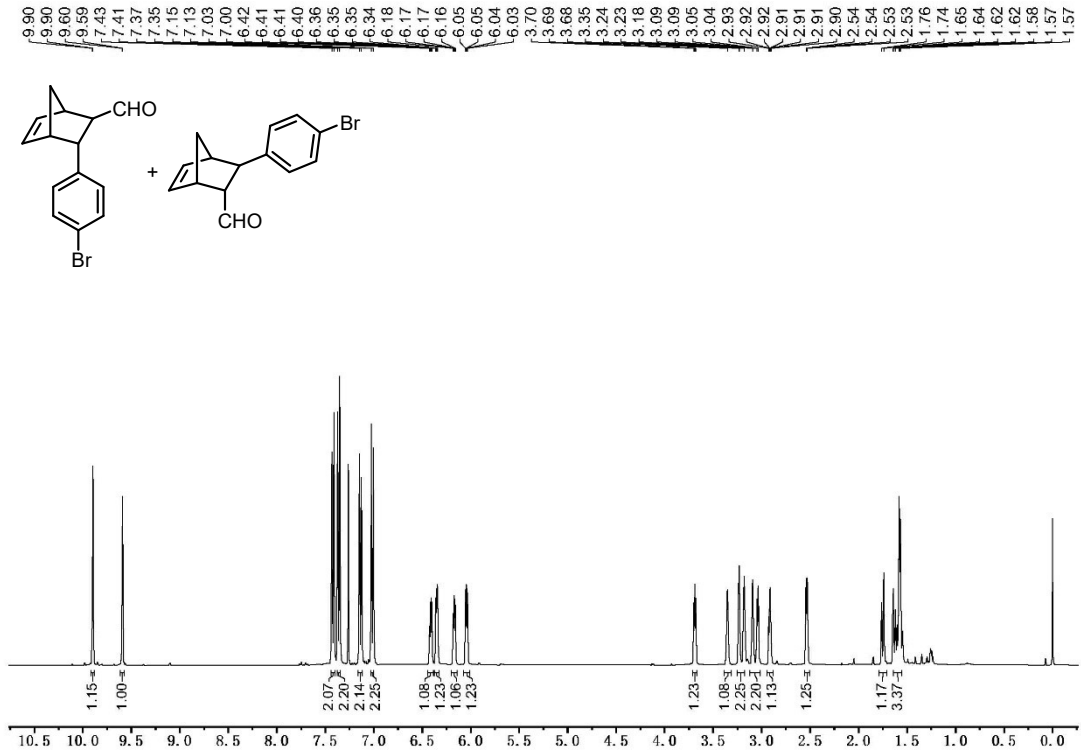

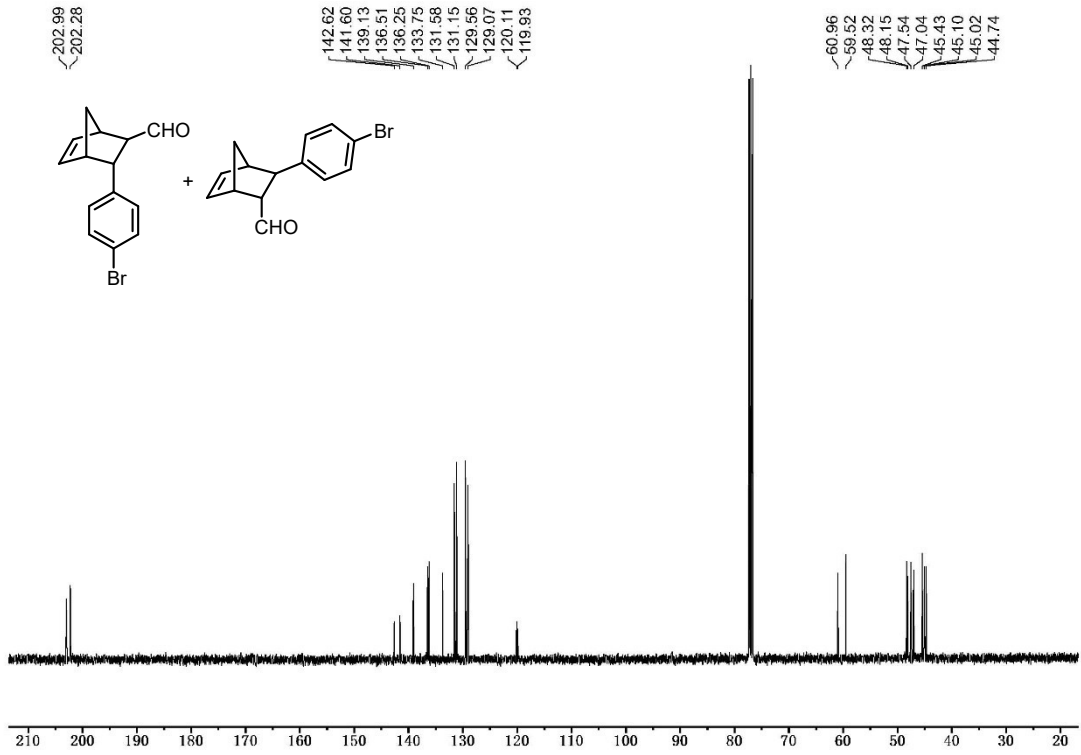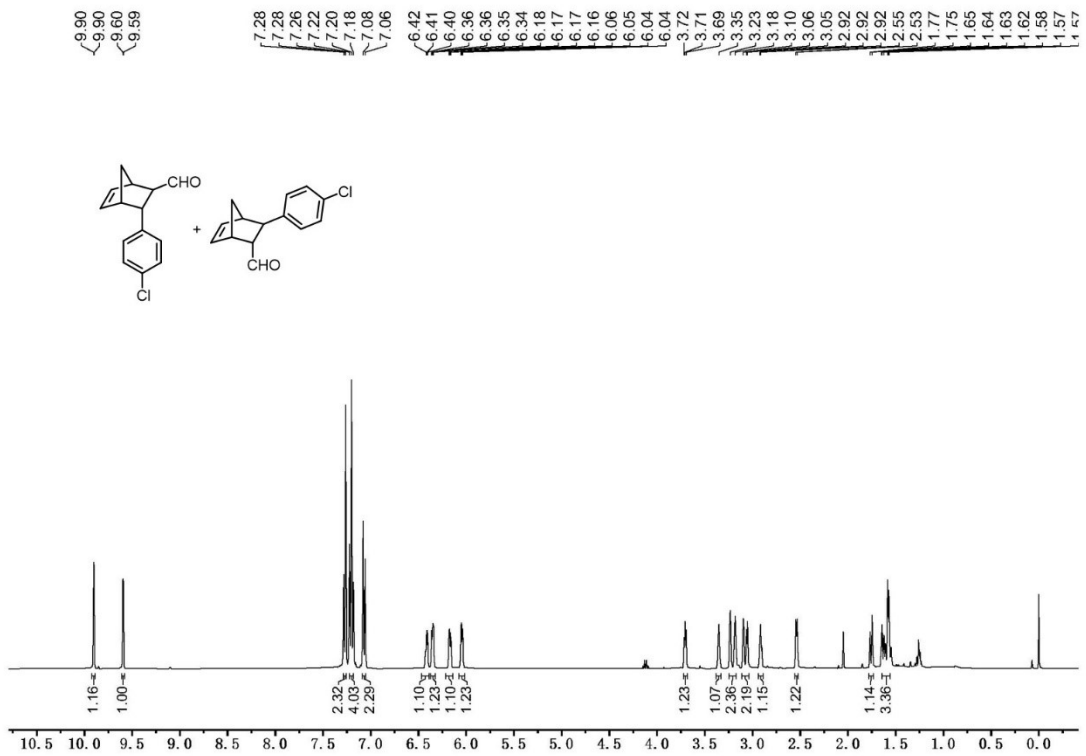

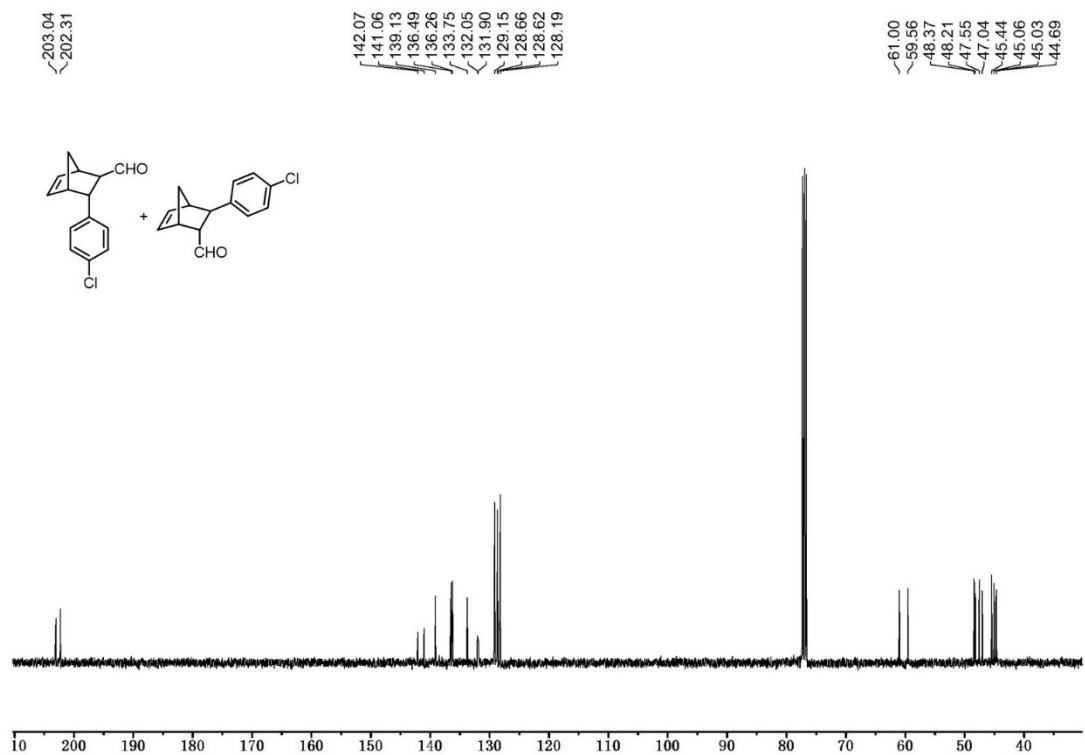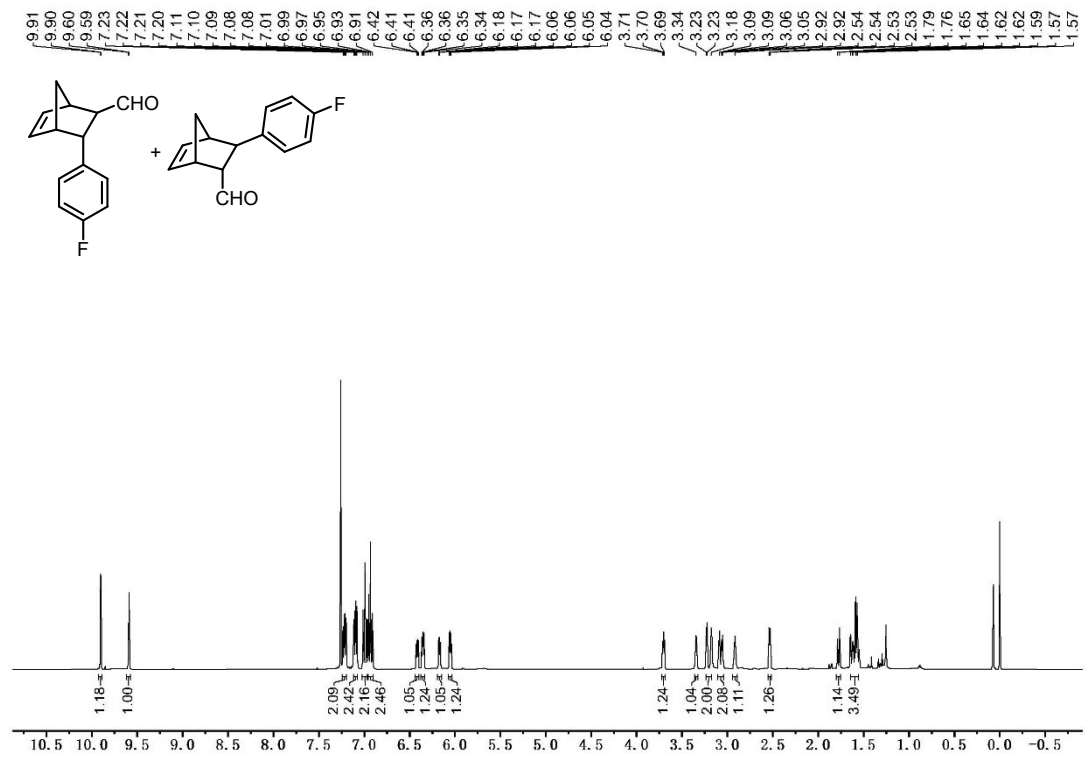

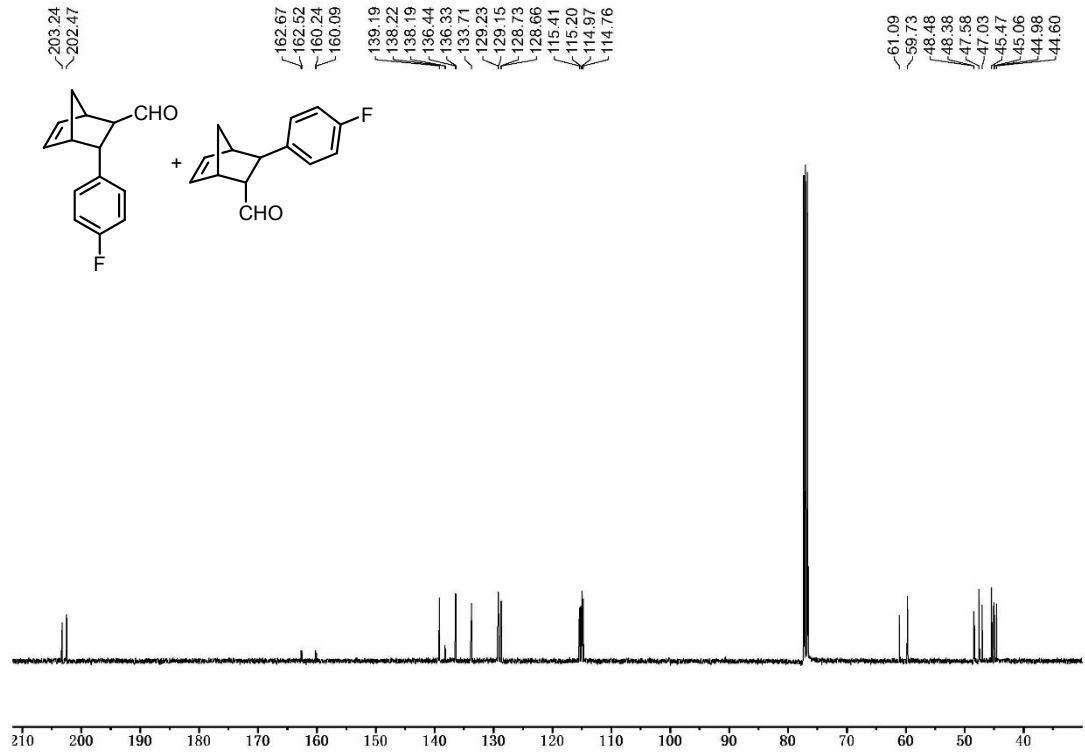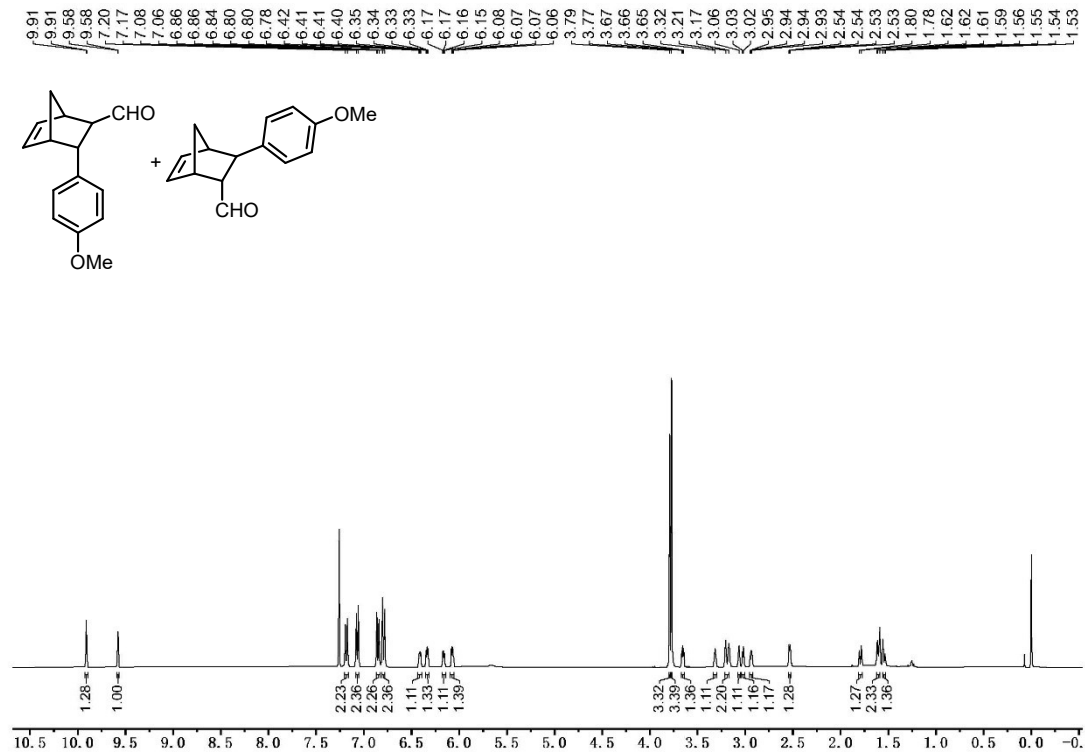

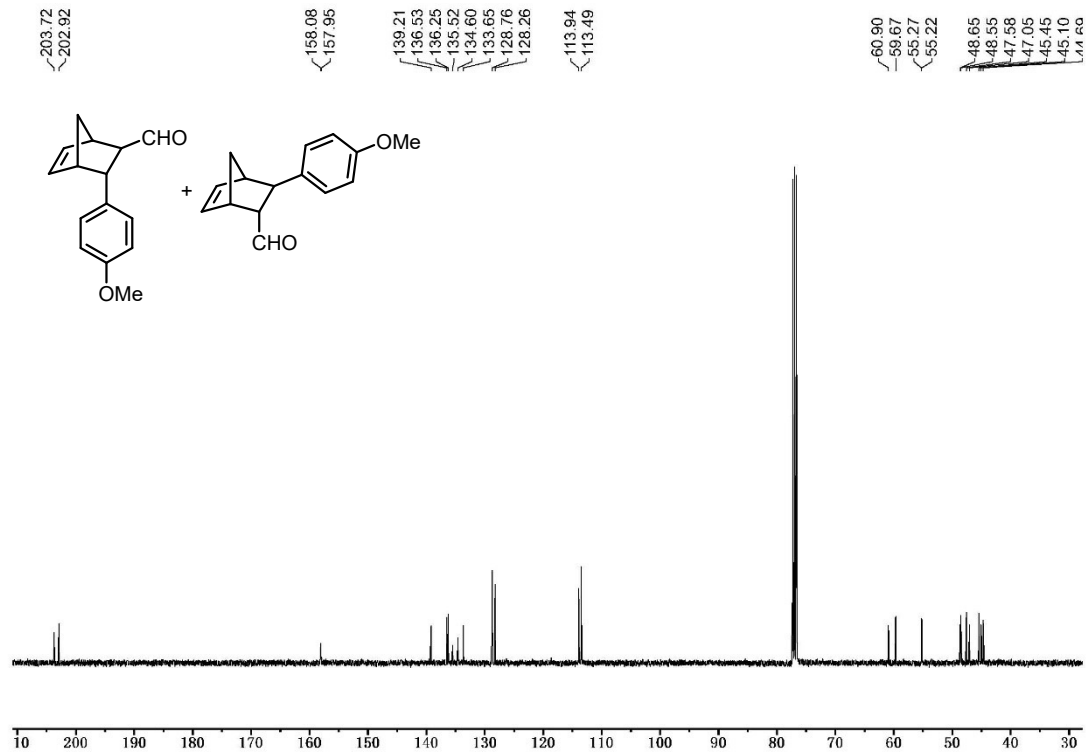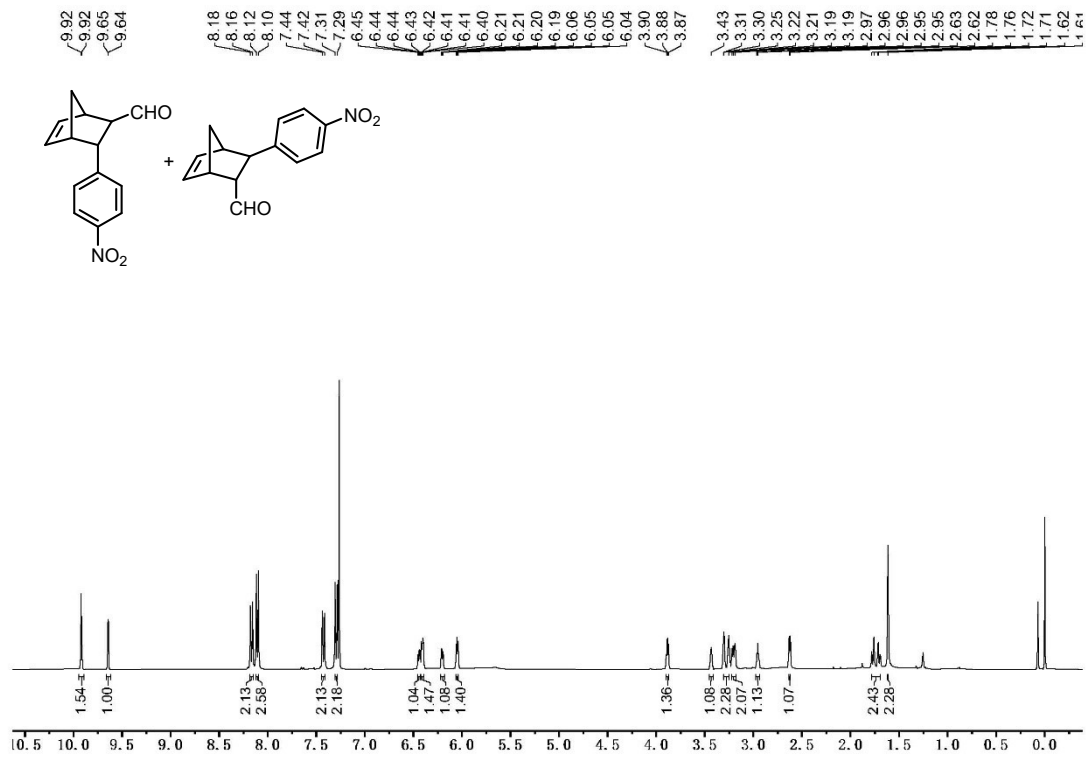

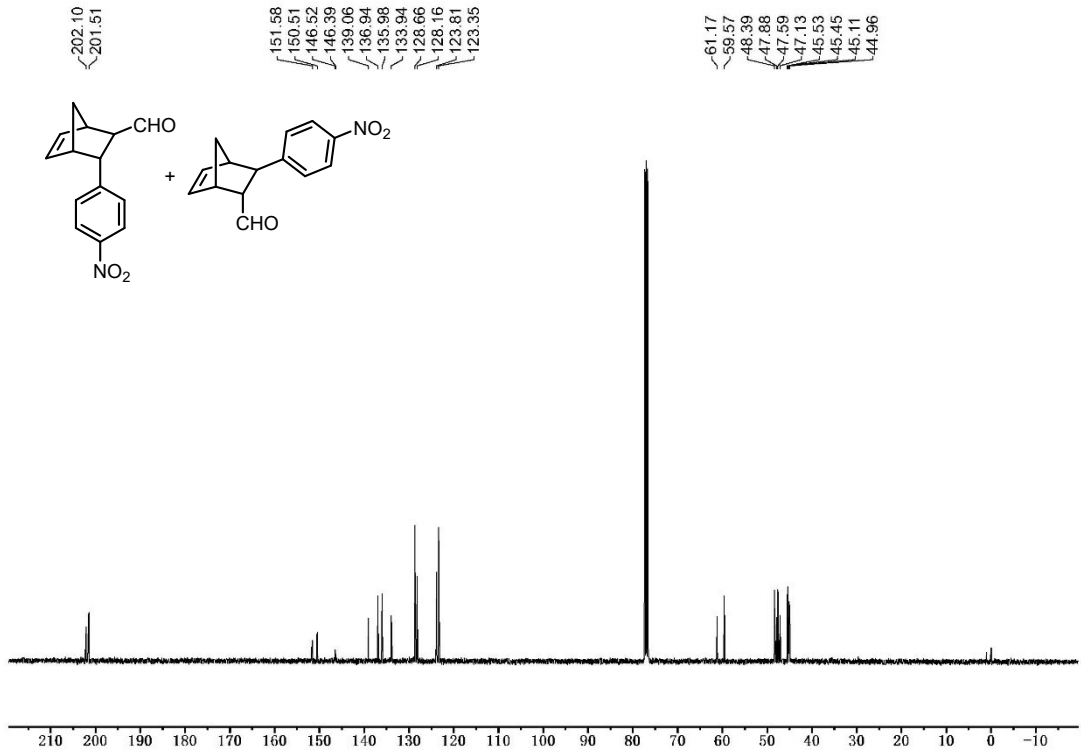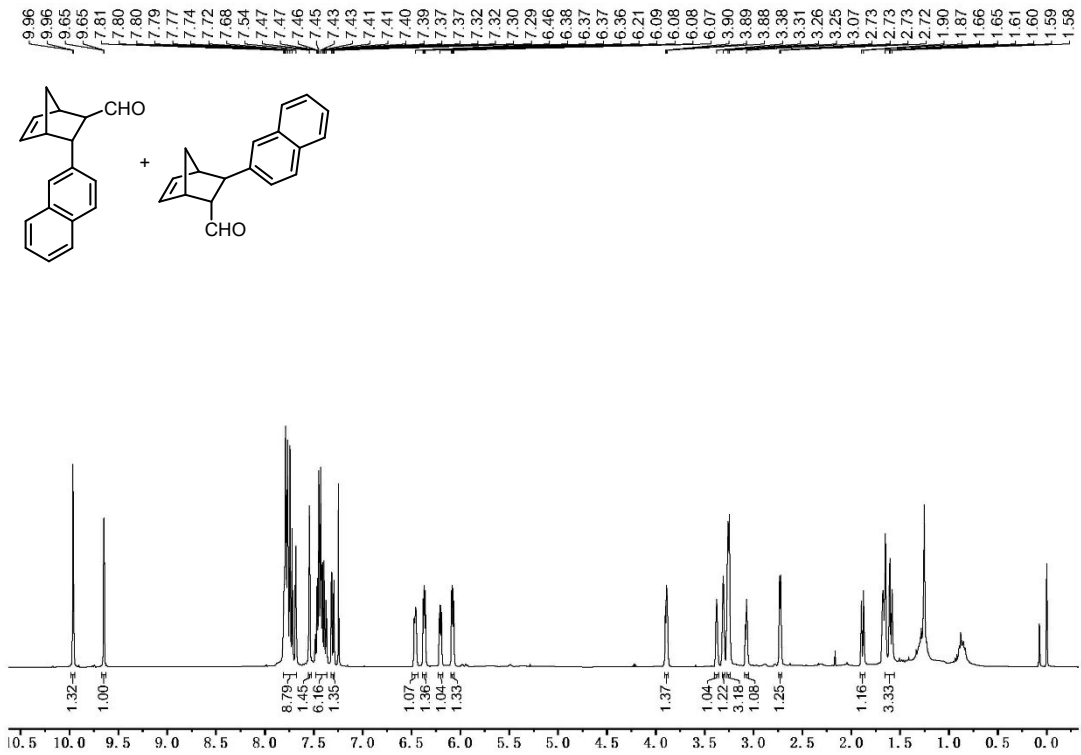



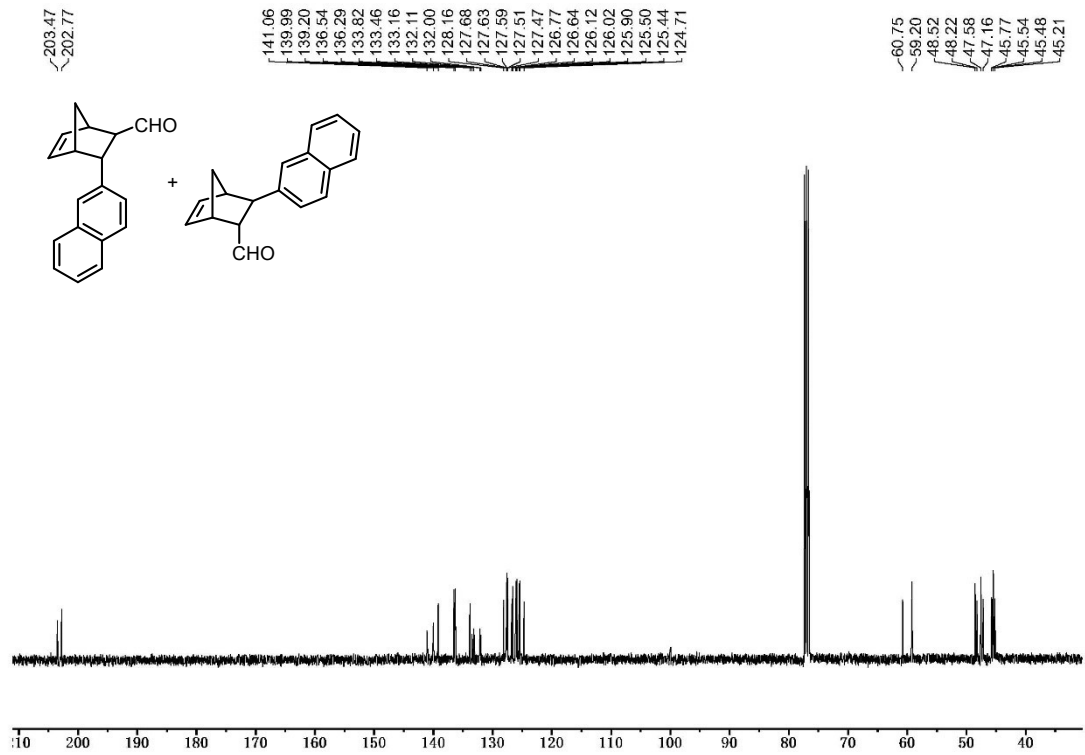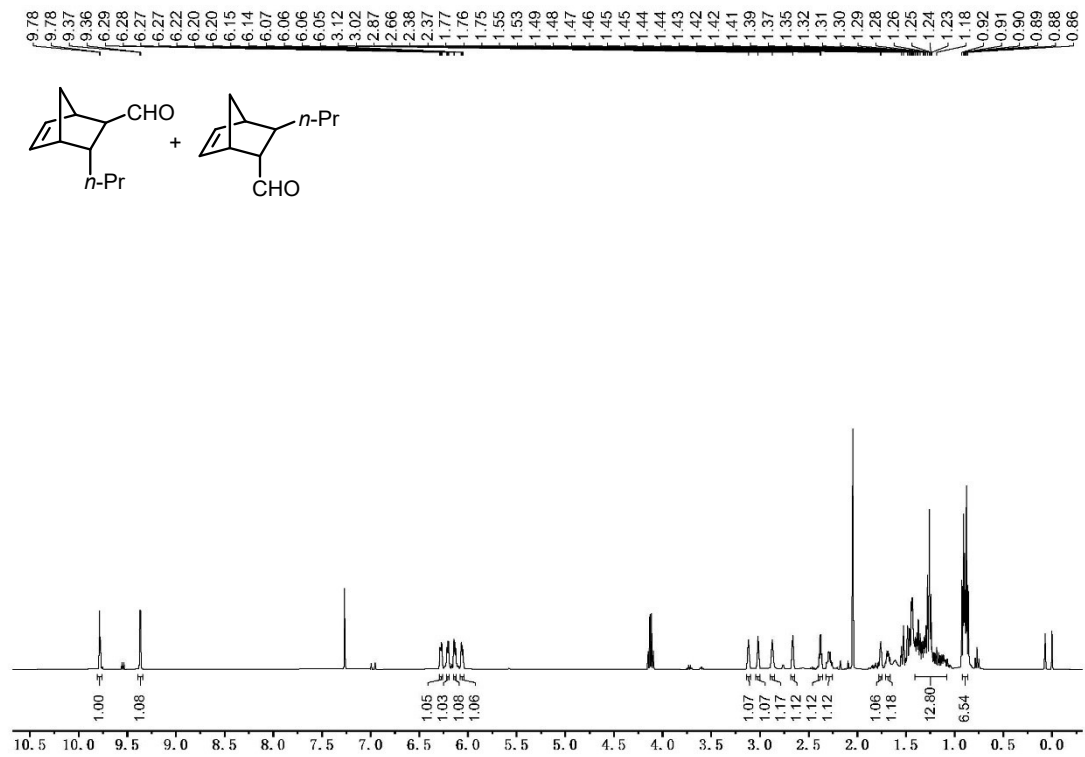

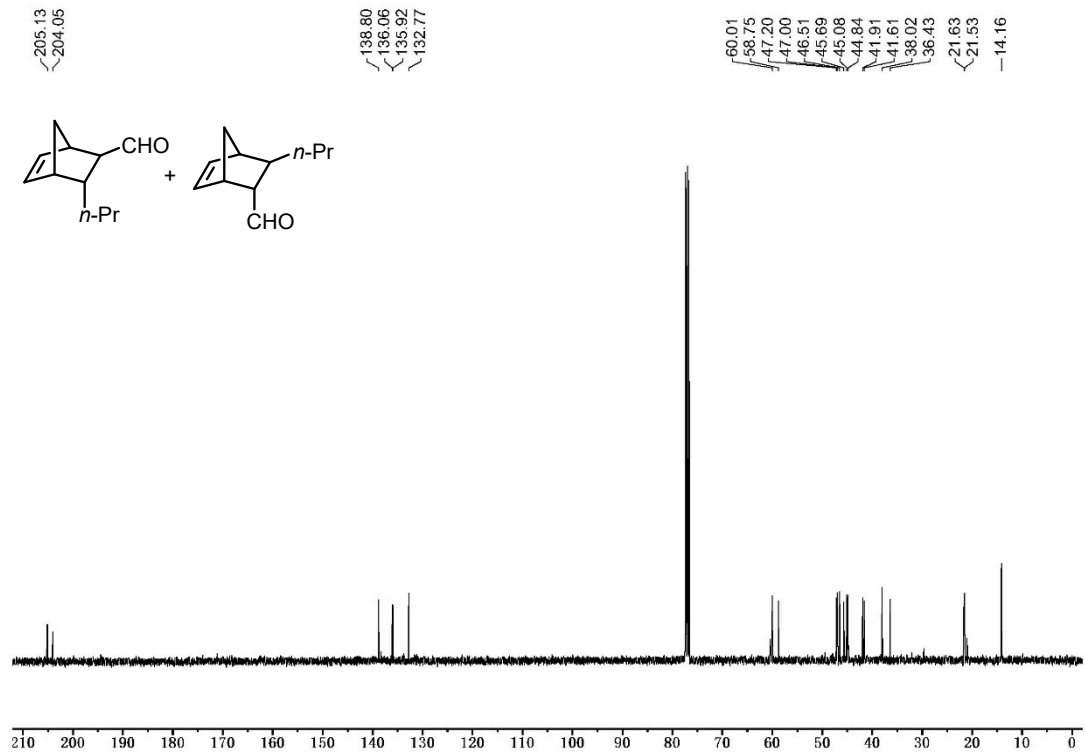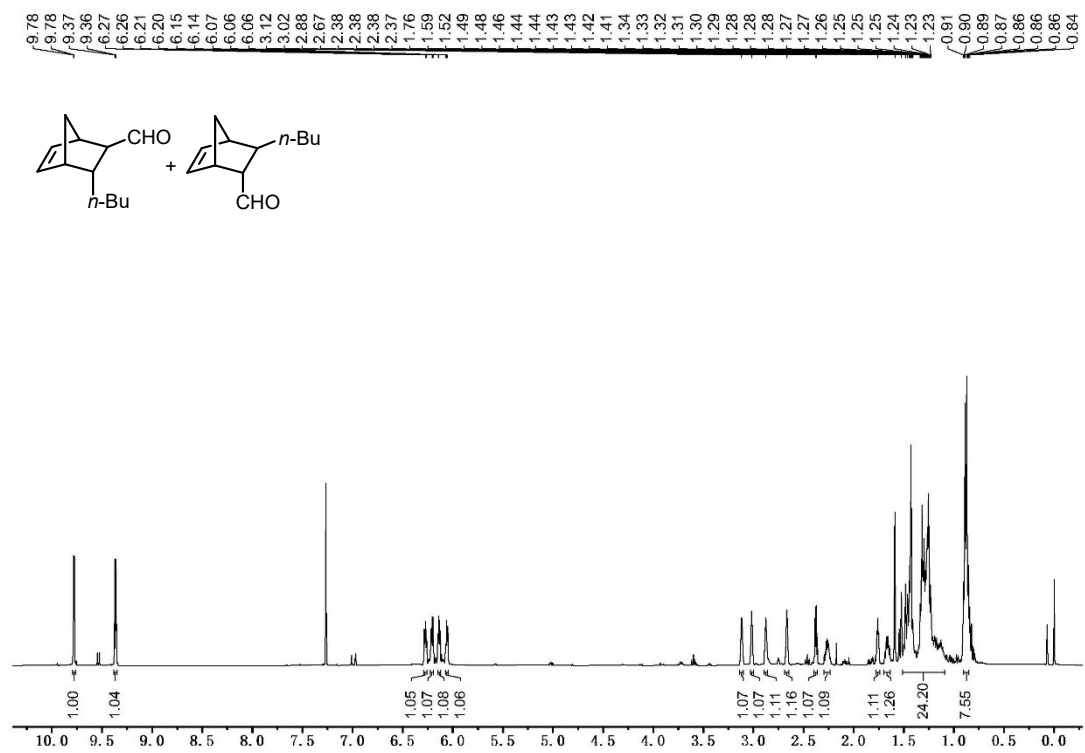

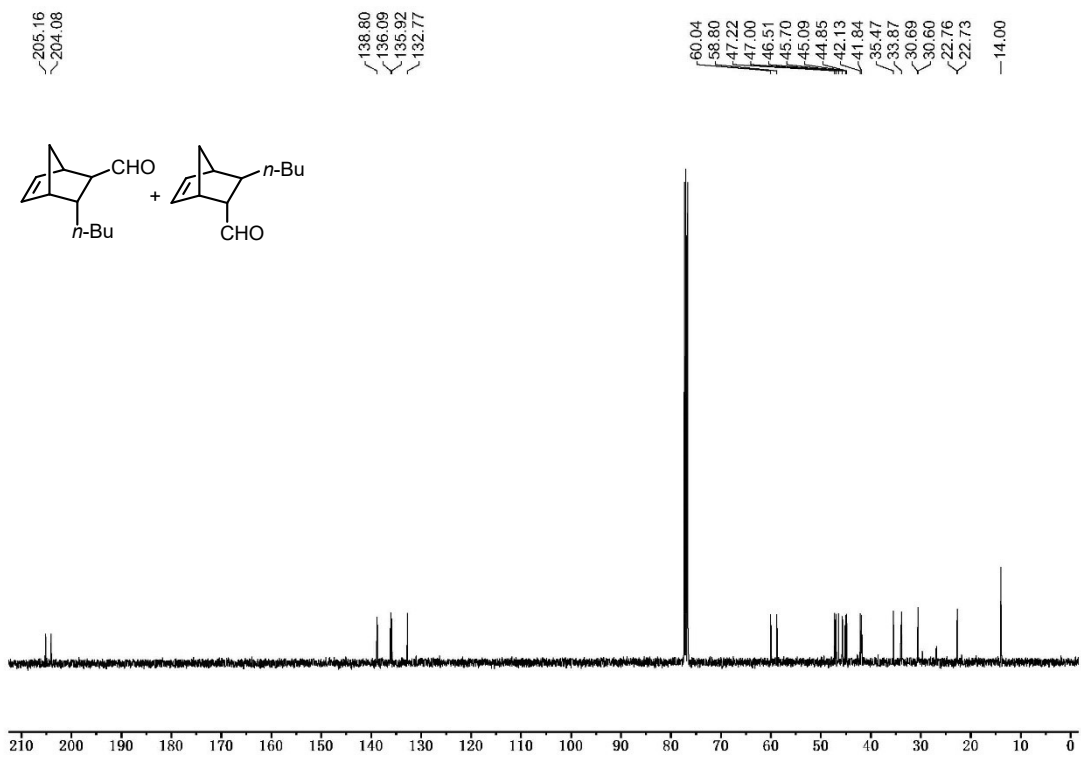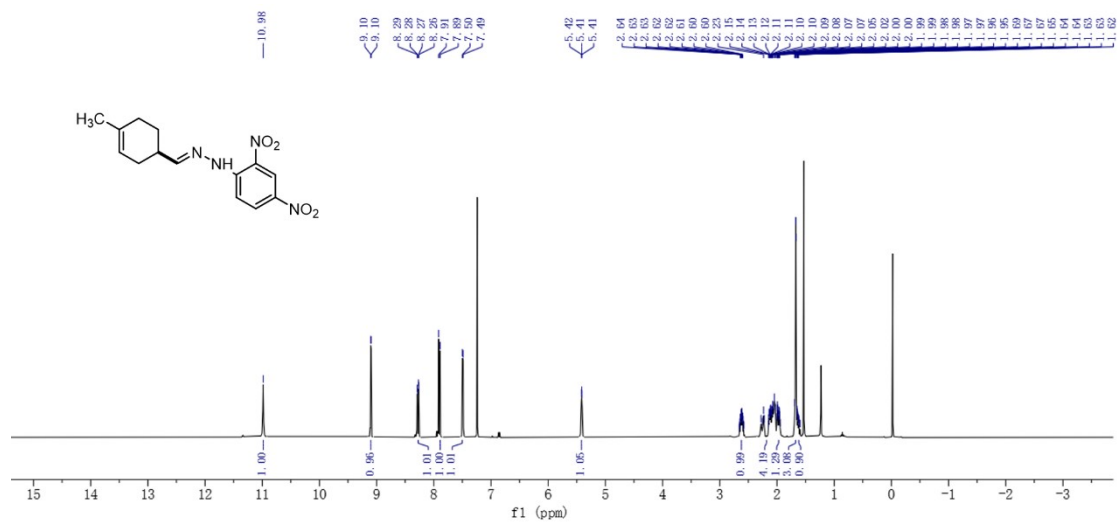

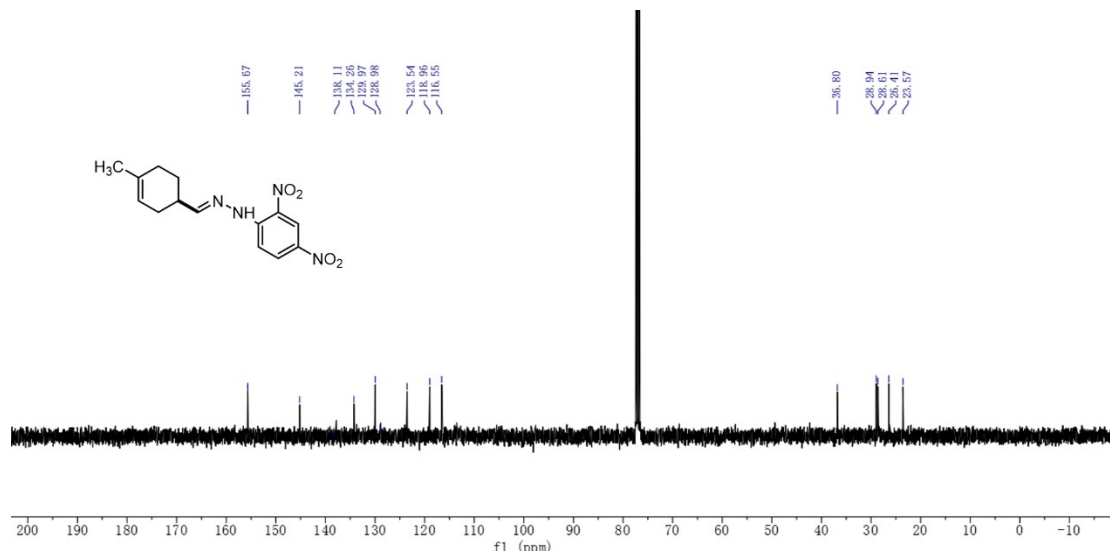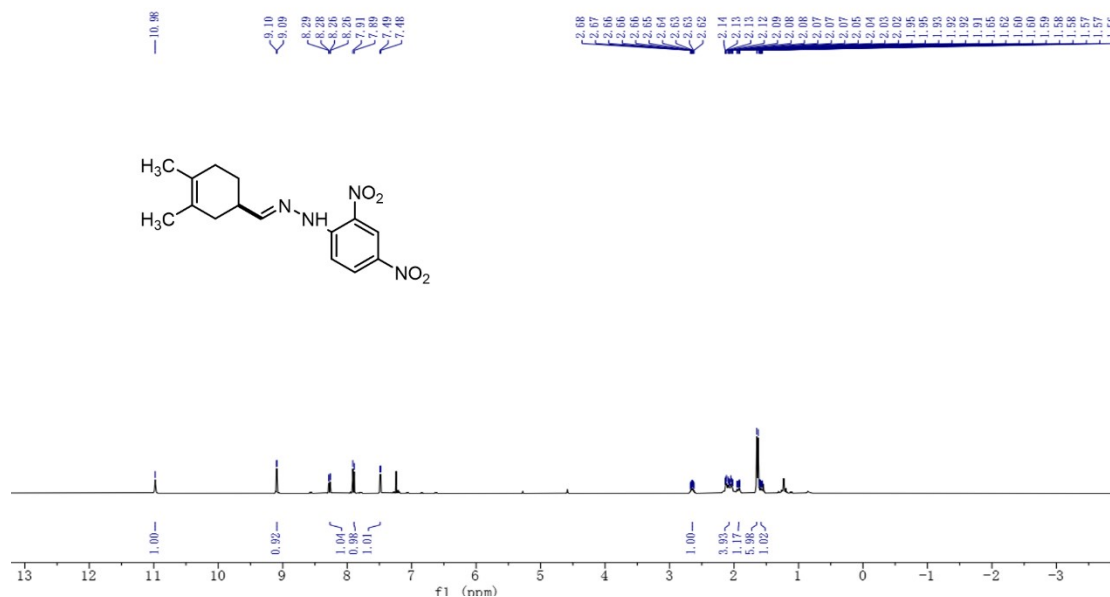

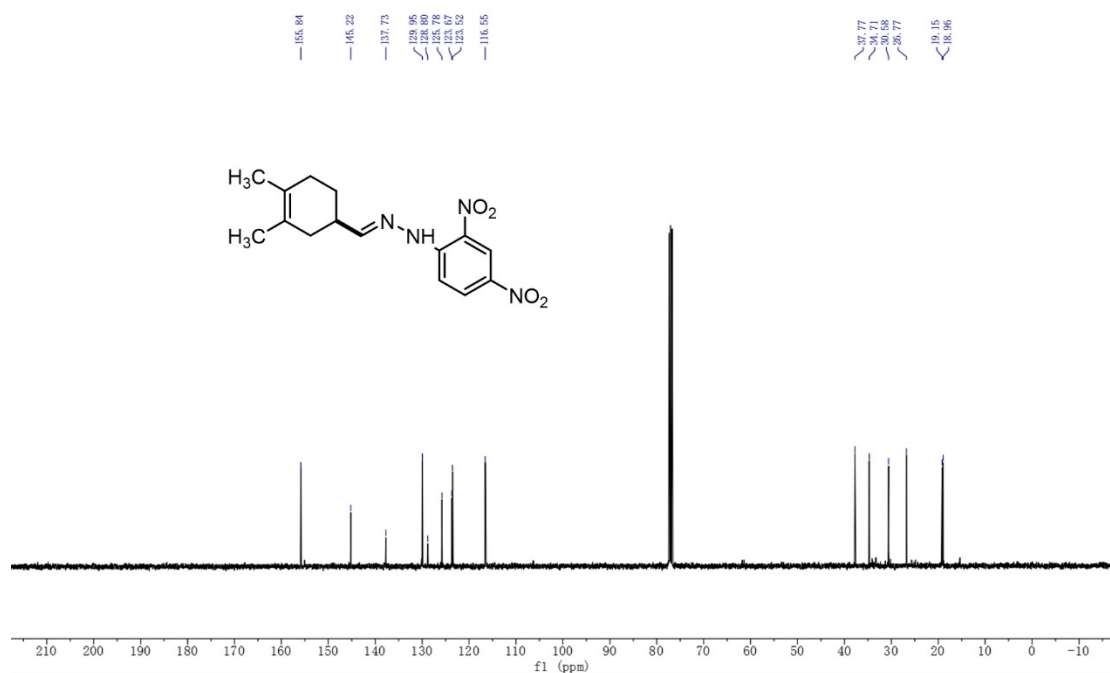

#### 4. Copies of HPLC spectra of product

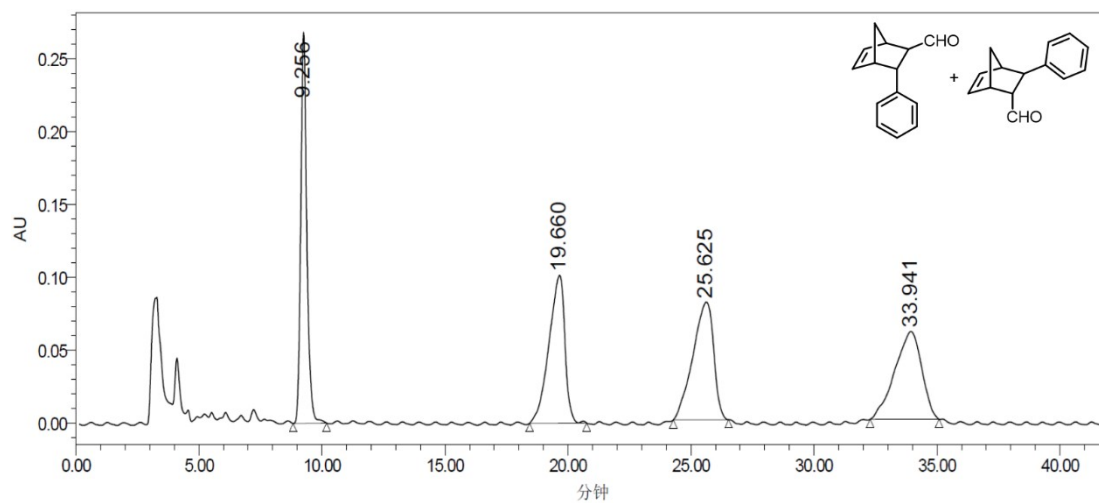

| Peak | Retention Time [min] | Area [microvolt*s] | Height [microvolt] | Relative Area [%] |
|------|----------------------|--------------------|--------------------|-------------------|
| 1    | 9.256                | 4602011            | 268449             | 24.88             |
| 2    | 19.660               | 4571487            | 101411             | 24.71             |
| 3    | 25.625               | 4742273            | 80755              | 25.64             |
| 4    | 33.941               | 4583357            | 60305              | 24.78             |

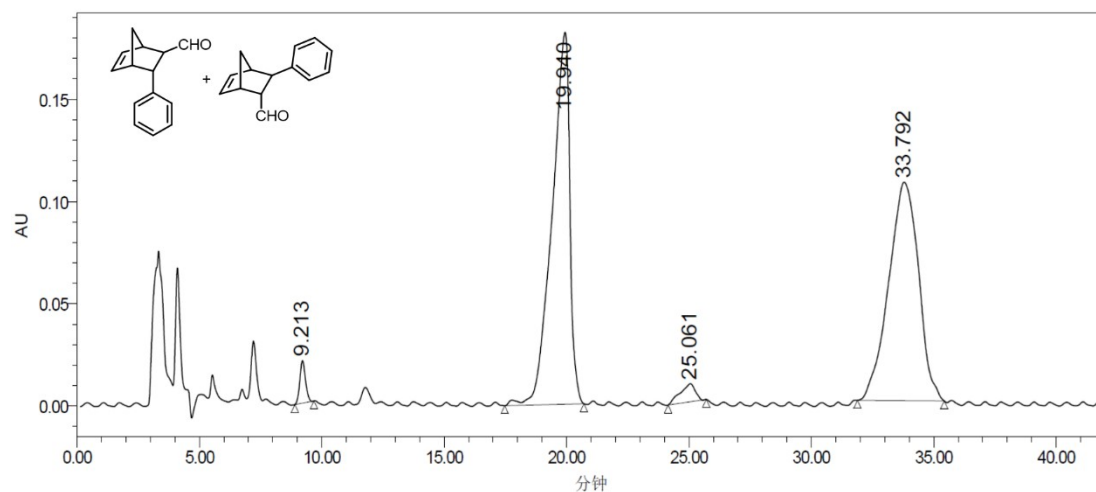

| Peak | Retention Time [min] | Area [microvolt*s] | Height [microvolt] | Relative Area [%] |
|------|----------------------|--------------------|--------------------|-------------------|
| 1    | 9.213                | 334977             | 20856              | 1.77              |
| 2    | 19.940               | 9166881            | 181928             | 48.32             |
| 3    | 25.061               | 381710             | 8854               | 2.01              |
| 4    | 33.792               | 9088323            | 106909             | 47.90             |

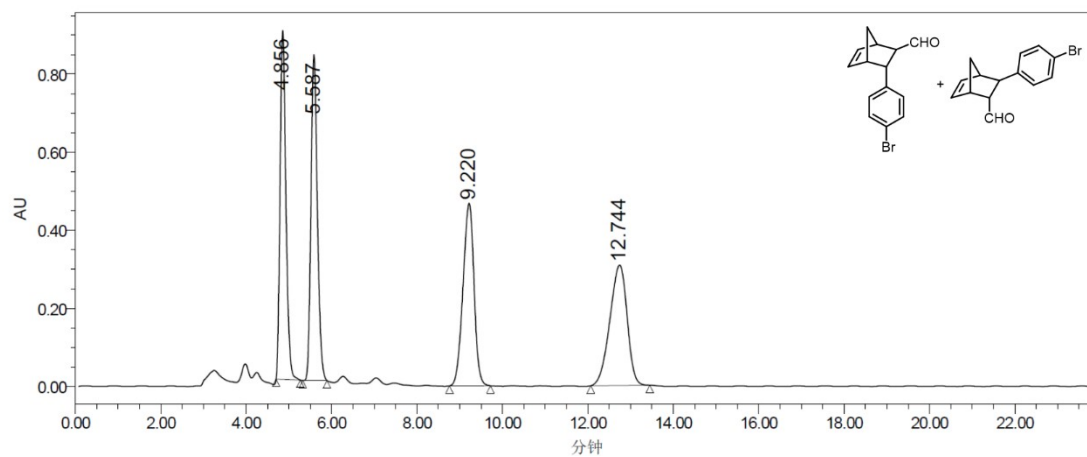

| Peak | Retention Time [min] | Area [microvolt*s] | Height [microvolt] | Relative Area [%] |
|------|----------------------|--------------------|--------------------|-------------------|
| 1    | 4.856                | 8478910            | 894679             | 24.78             |
| 2    | 5.587                | 8680399            | 836494             | 25.37             |
| 3    | 9.220                | 8396427            | 467631             | 24.54             |
| 4    | 12.744               | 8665909            | 308544             | 25.32             |

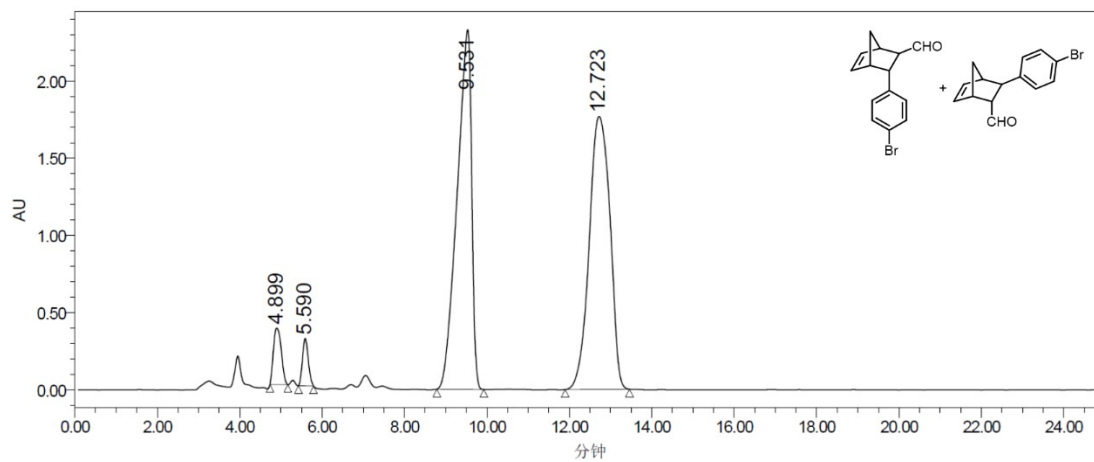

| Peak | Retention Time [min] | Area [microvolt*s] | Height [microvolt] | Relative Area [%] |
|------|----------------------|--------------------|--------------------|-------------------|
| 1    | 4.899                | 4847647            | 365408             | 3.83              |
| 2    | 5.590                | 3000439            | 306801             | 2.37              |
| 3    | 9.531                | 56954630           | 2327793            | 44.99             |
| 4    | 12.723               | 61788914           | 1765911            | 48.81             |

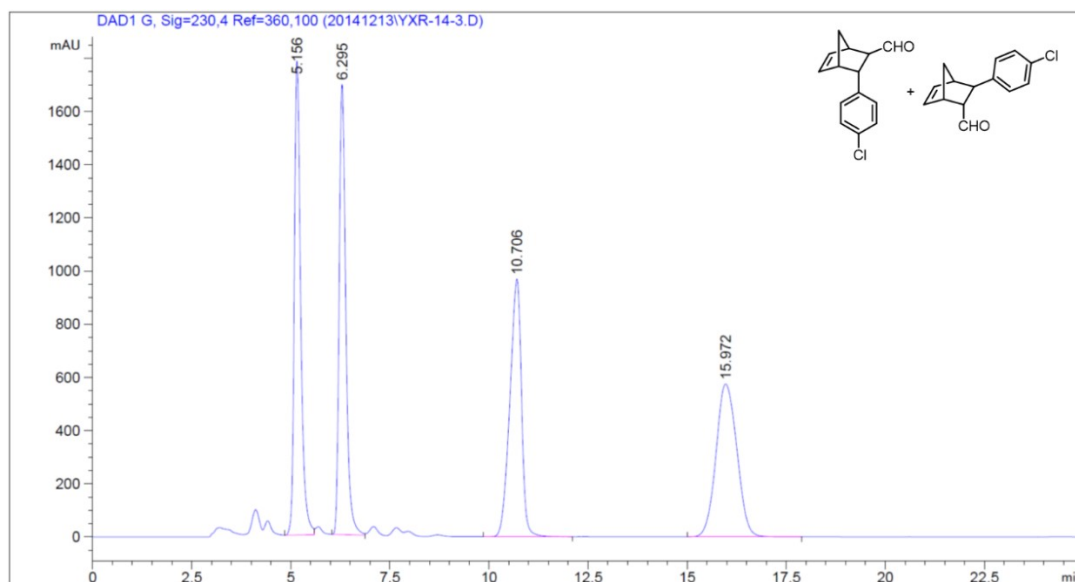

| Peak | Retention Time [min] | Area [mAU*s] | Height [mAU] | Relative Area [%] |
|------|----------------------|--------------|--------------|-------------------|
| 1    | 5.156                | 1.99959e4    | 1783.97327   | 24.8167           |
| 2    | 6.295                | 1.97281e4    | 1694.29089   | 24.4843           |
|      | 10.706               | 1.98124e4    | 969.28064    | 24.5889           |
|      | 15.972               | 2.10381e4    | 574.78815    | 26.1101           |

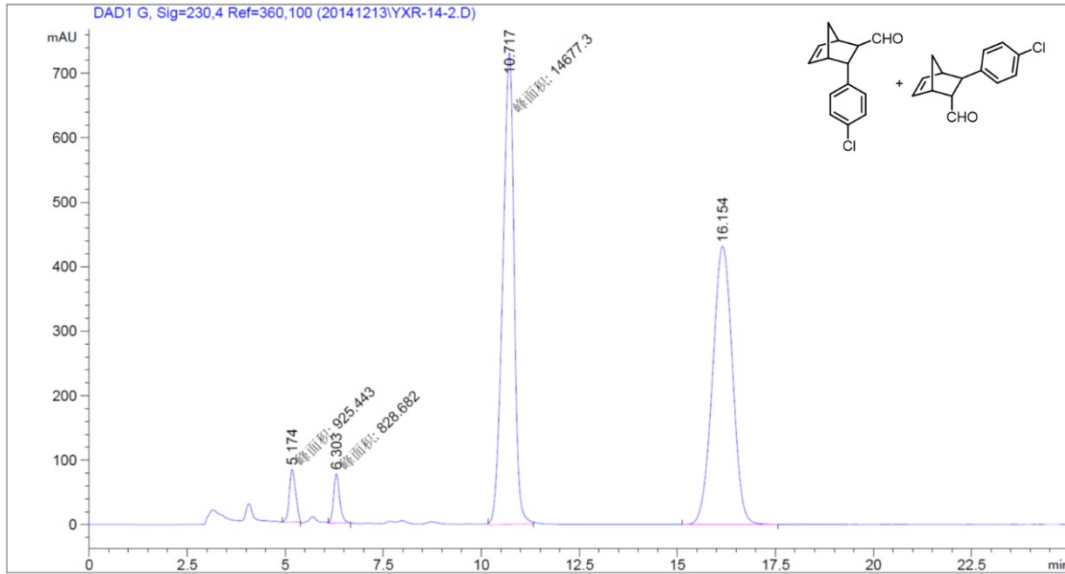

| Peak | Retention Time [min] | Area [mAU*s] | Height [mAU] | Relative Area [%] |
|------|----------------------|--------------|--------------|-------------------|
| 1    | 5.174                | 925.44299    | 82.06293     | 2.9226            |
| 2    | 6.303                | 828.68219    | 76.42378     | 2.6171            |
| 3    | 10.717               | 1.46773e4    | 731.51764    | 46.3525           |
| 4    | 16.154               | 1.52331e4    | 431.43854    | 48.1078           |

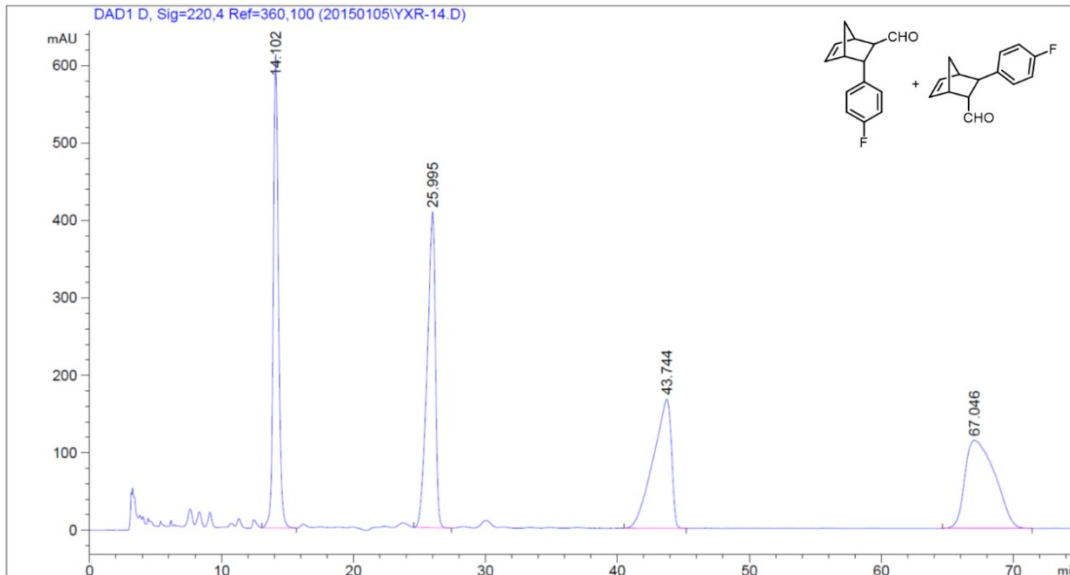

| Peak | Retention Time [min] | Area [mAU*s] | Height [mAU] | Relative Area [%] |
|------|----------------------|--------------|--------------|-------------------|
| 1    | 14.102               | 1.65701e4    | 611.34021    | 24.3042           |
| 2    | 25.995               | 1.76448e4    | 408.06799    | 25.8806           |
| 3    | 43.744               | 1.60629e4    | 166.75073    | 23.5603           |
| 4    | 67.046               | 1.79001e4    | 114.00917    | 26.2549           |



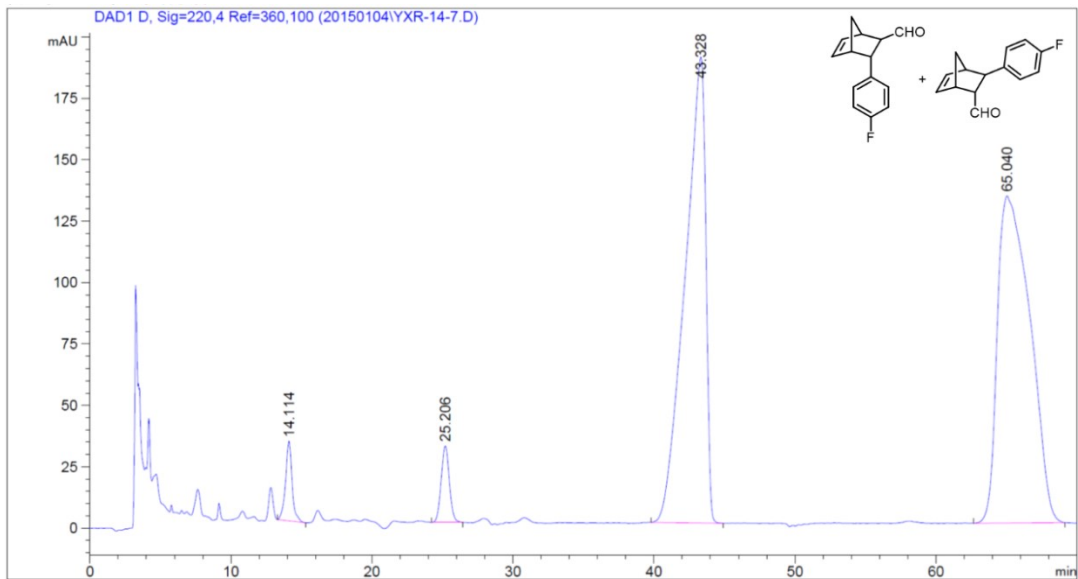

| Peak | Retention Time [min] | Area [mAU*s] | Height [mAU] | Relative Area [%] |
|------|----------------------|--------------|--------------|-------------------|
| 1    | 14.114               | 1045.77380   | 32.47417     | 2.4355            |
| 2    | 25.206               | 1253.16882   | 31.11964     | 2.9185            |
| 3    | 43.328               | 1.92307e4    | 189.71445    | 44.7861           |
| 4    | 65.040               | 2.14093e4    | 133.20595    | 49.8599           |

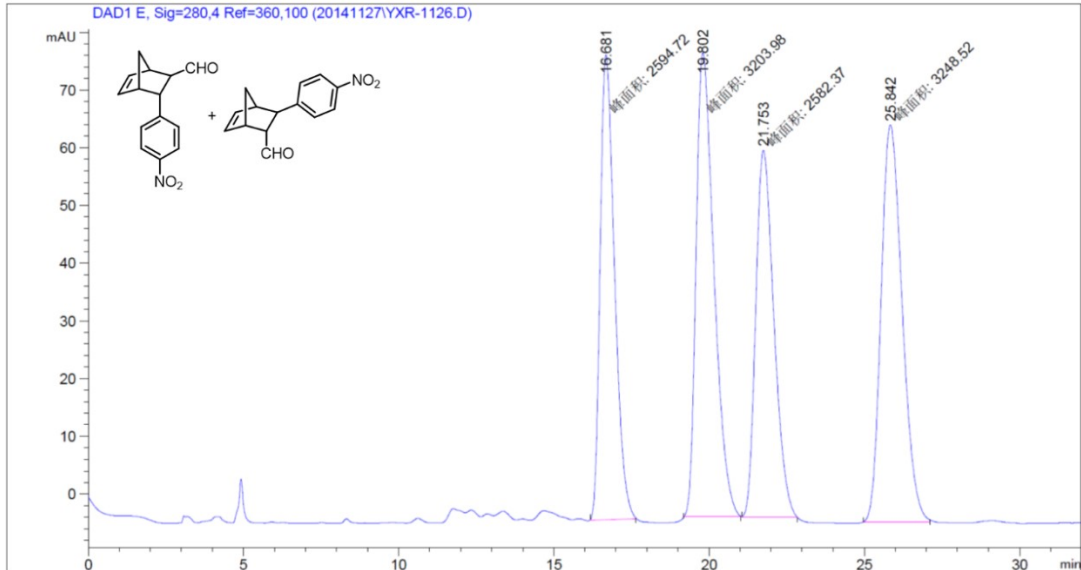

| Peak | Retention Time [min] | Area [mAU*s] | Height [mAU] | Relative Area [%] |
|------|----------------------|--------------|--------------|-------------------|
| 1    | 16.681               | 2594.71582   | 80.53811     | 22.3113           |
| 2    | 19.802               | 3203.98193   | 80.37839     | 27.5503           |
| 3    | 21.753               | 2582.36890   | 63.46484     | 22.2052           |
| 4    | 25.842               | 3248.52466   | 68.80418     | 27.9333           |

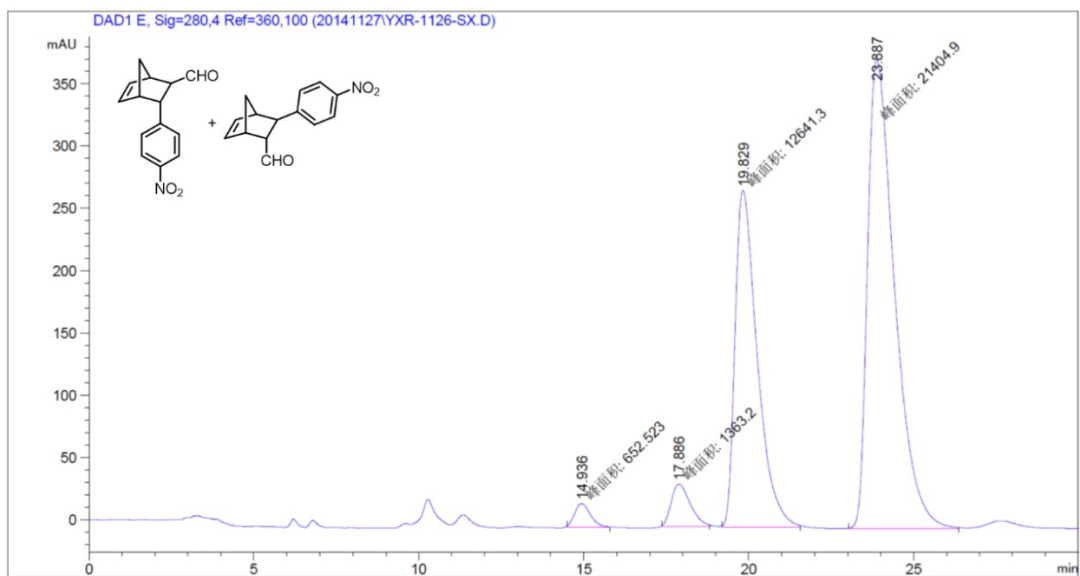

| Peak | Retention Time [min] | Area [mAU*s] | Height [mAU] | Relative Area [%] |
|------|----------------------|--------------|--------------|-------------------|
| 1    | 14.936               | 652.52313    | 19.20616     | 1.8094            |
| 2    | 17.886               | 1363.19727   | 33.92844     | 3.7801            |
| 3    | 19.829               | 1.26413e4    | 270.41690    | 35.0545           |
| 4    | 23.887               | 2.14049e4    | 376.10620    | 59.3559           |

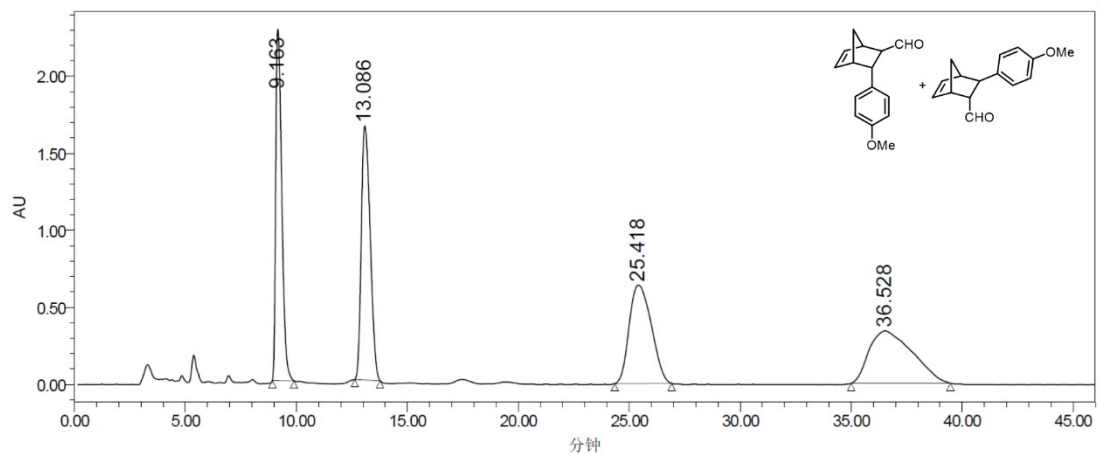

| Peak | Retention Time [min] | Area [microvolt*s] | Height [microvolt] | Relative Area [%] |
|------|----------------------|--------------------|--------------------|-------------------|
| 1    | 9.163                | 43035059           | 2281249            | 24.03             |
| 2    | 13.086               | 43035059           | 1648518            | 25.57             |
| 3    | 25.418               | 44293951           | 639461             | 24.74             |
| 4    | 36.528               | 45950716           | 340337             | 25.66             |

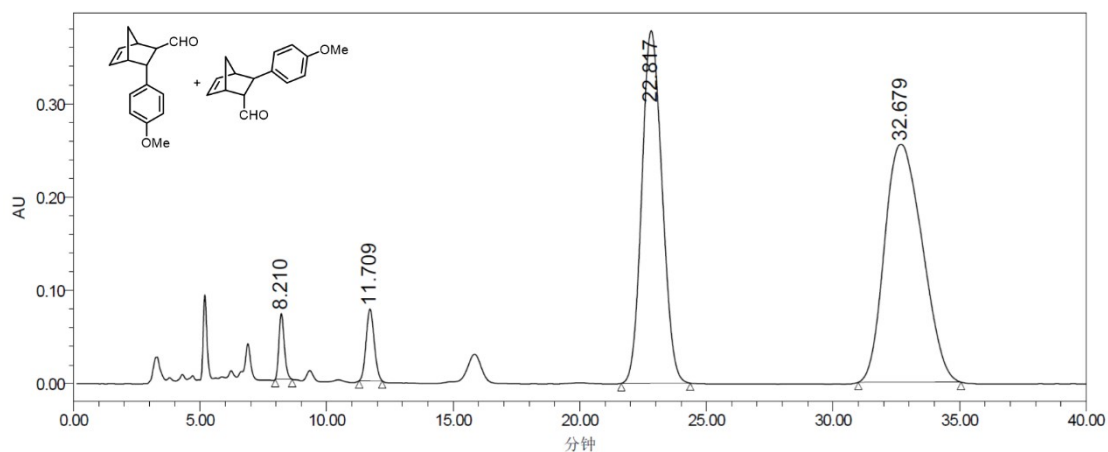

| Peak | Retention Time [min] | Area [microvolt*s] | Height [microvolt] | Relative Area [%] |
|------|----------------------|--------------------|--------------------|-------------------|
| 1    | 8.210                | 1046721            | 70643              | 2.09              |
| 2    | 11.709               | 1706167            | 76596              | 3.40              |
| 3    | 22.817               | 20988777           | 377795             | 41.84             |
| 4    | 32.679               | 26420142           | 254787             | 52.67             |

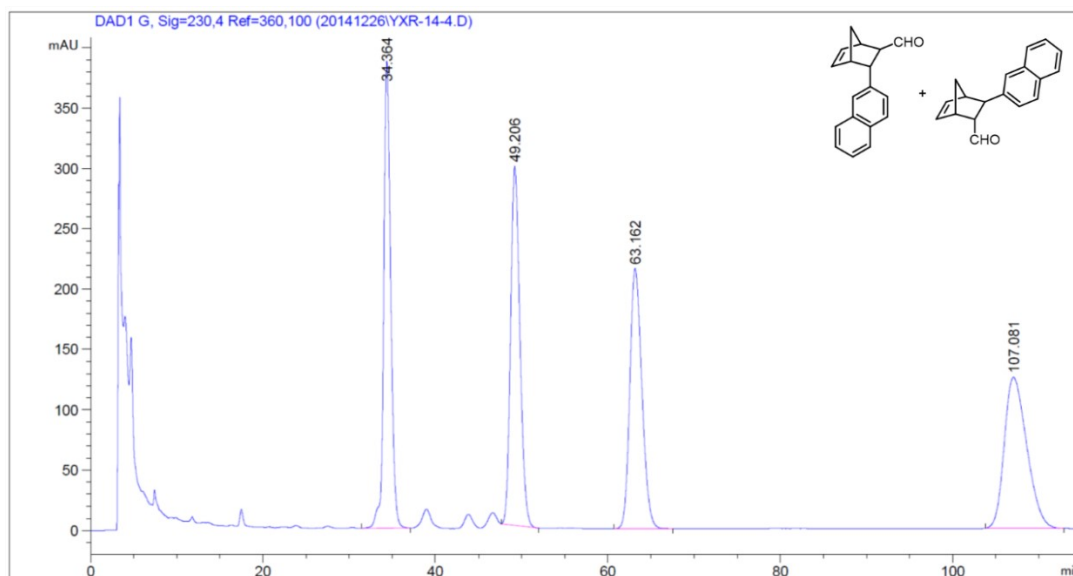

| Peak | Retention Time [min] | Area [mAU*s] | Height [mAU] | Relative Area [%] |
|------|----------------------|--------------|--------------|-------------------|
| 1    | 34.364               | 2.16306e4    | 387.35880    | 24.7017           |
| 2    | 49.206               | 2.22556e4    | 297.55243    | 25.4154           |
| 3    | 63.162               | 2.09928e4    | 216.05513    | 23.9733           |
| 4    | 107.081              | 2.26884e4    | 125.53026    | 25.9097           |

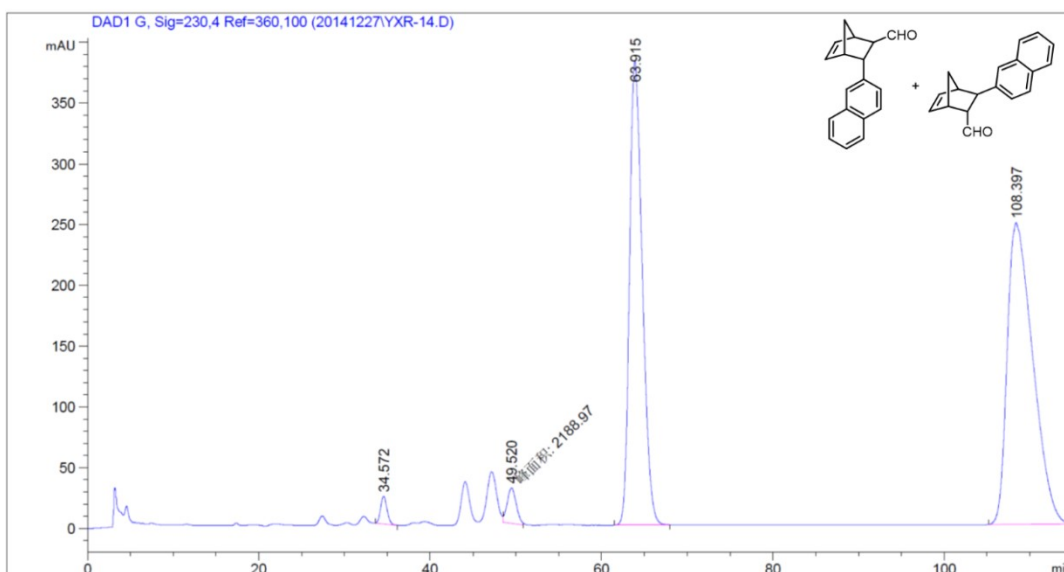

| Peak | Retention Time [min] | Area [mAU*s] | Height [mAU] | Relative Area [%] |
|------|----------------------|--------------|--------------|-------------------|
| 1    | 34.572               | 1177.30334   | 22.65335     | 1.2465            |
| 2    | 49.520               | 2188.96729   | 29.36175     | 2.3177            |
| 3    | 63.915               | 3.96087e4    | 381.54727    | 41.9383           |
| 4    | 108.397              | 5.14701e4    | 248.37175    | 54.4974           |

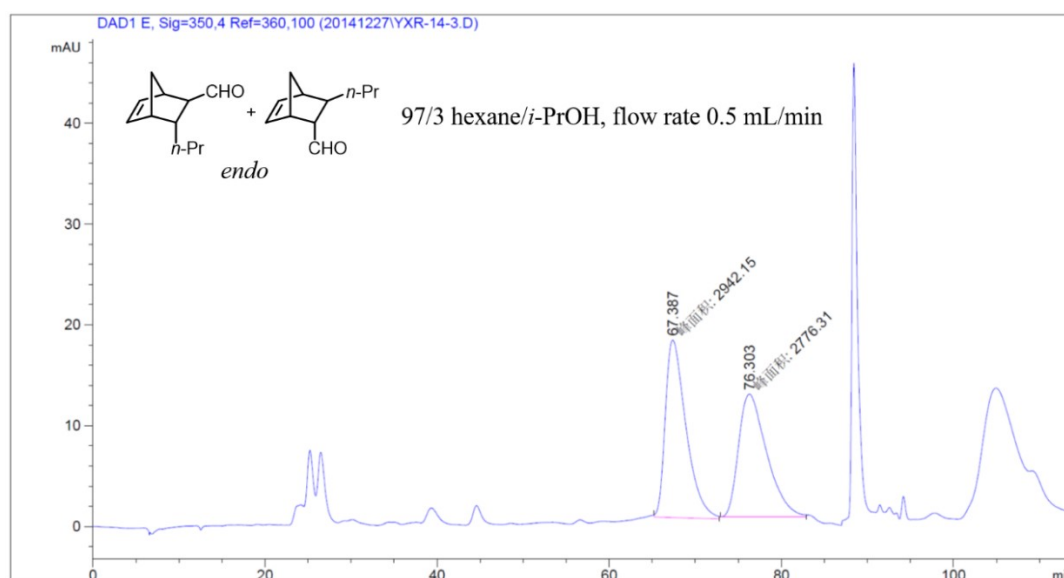

| Peak | Retention Time [min] | Area [mAU*s] | Height [mAU] | Relative Area [%] |
|------|----------------------|--------------|--------------|-------------------|
| 1    | 67.387               | 2942.15308   | 17.60140     | 51.4501           |
| 2    | 76.303               | 2776.31152   | 12.20779     | 48.5499           |

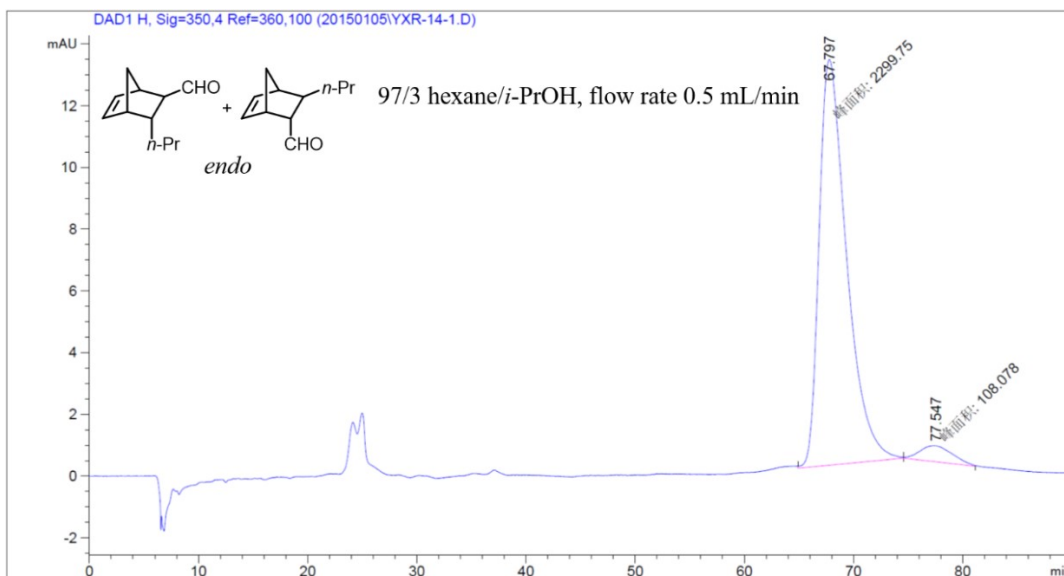

| Peak | Retention Time [min] | Area [mAU*s] | Height [mAU] | Relative Area [%] |
|------|----------------------|--------------|--------------|-------------------|
| 1    | 67.797               | 2299.74780   | 13.14571     | 95.5114           |
| 2    | 77.547               | 108.07756    | 5.22665e-1   | 4.4886            |

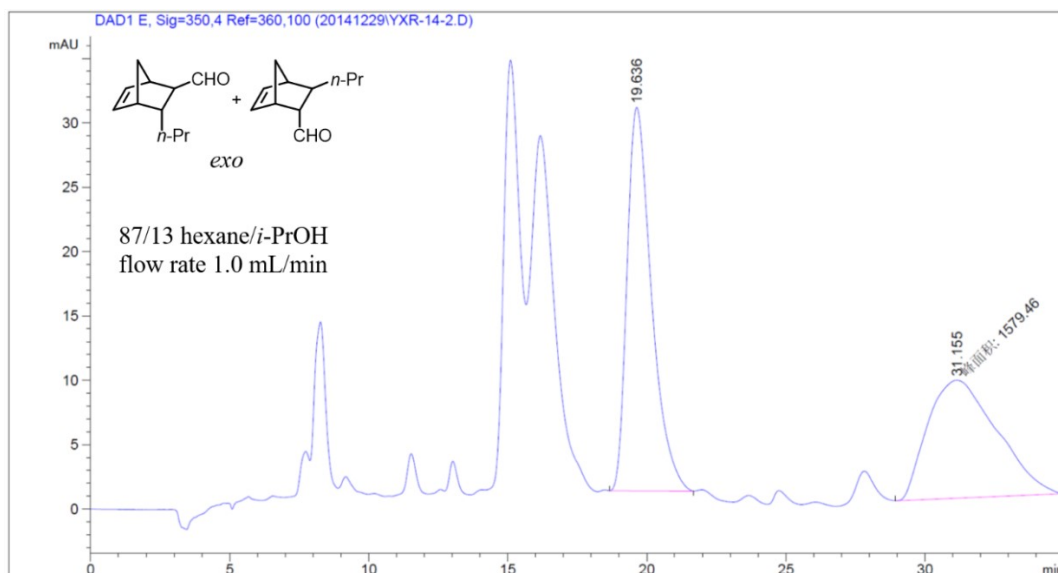

| Peak | Retention Time [min] | Area [mAU*s] | Height [mAU] | Relative Area [%] |
|------|----------------------|--------------|--------------|-------------------|
| 1    | 19.636               | 1824.40112   | 29.78798     | 53.5980           |
| 2    | 31.155               | 1579.45642   | 9.16245      | 46.4020           |

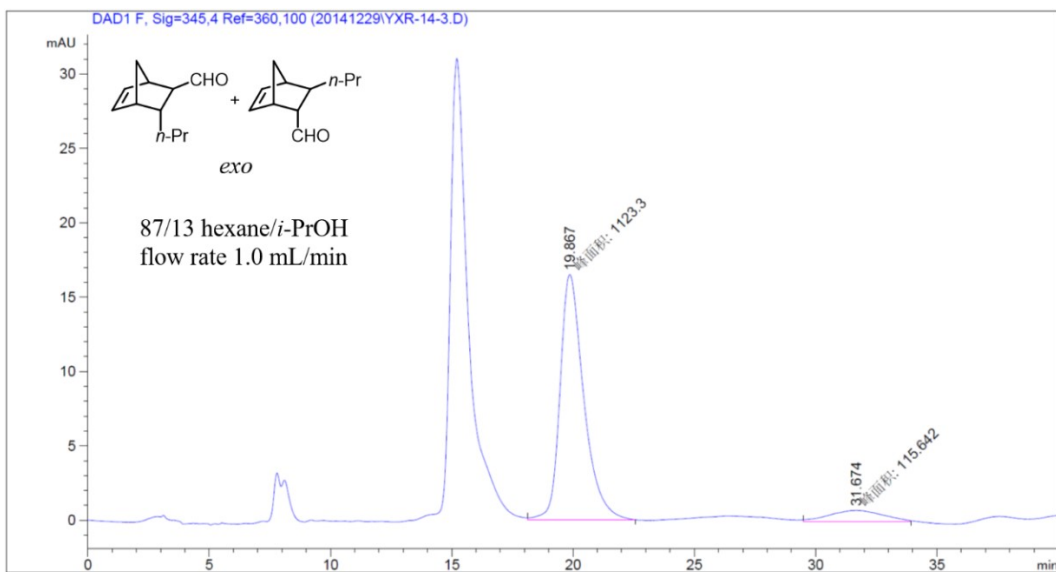

| Peak | Retention Time [min] | Area [mAU*s] | Height [mAU] | Relative Area [%] |
|------|----------------------|--------------|--------------|-------------------|
| 1    | 19.867               | 1123.30151   | 16.49524     | 90.6661           |
| 2    | 31.674               | 115.64172    | 7.53940e-1   | 9.3339            |

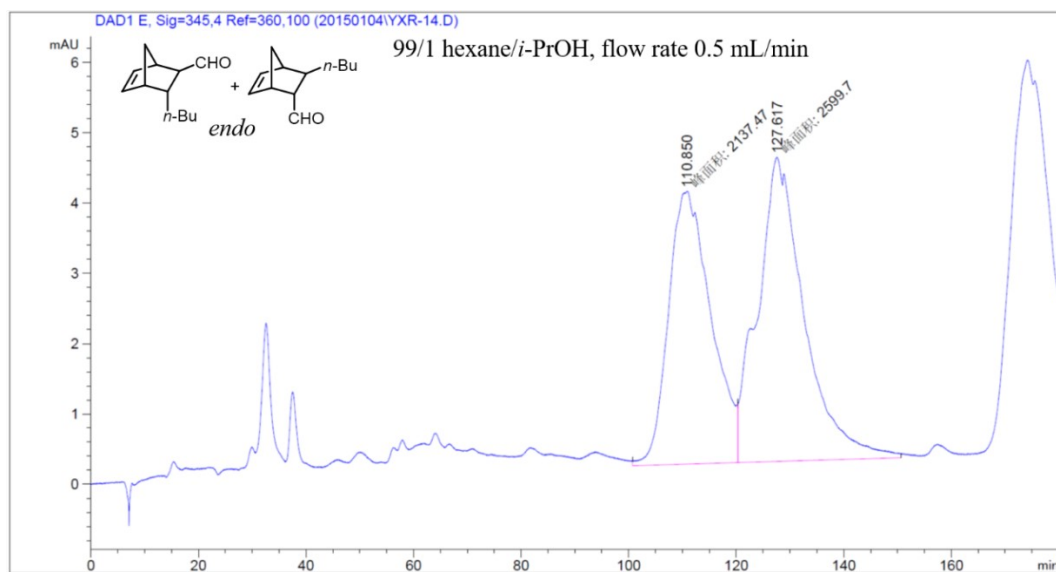

| Peak | Retention Time [min] | Area [mAU*s] | Height [mAU] | Relative Area [%] |
|------|----------------------|--------------|--------------|-------------------|
| 1    | 110.850              | 2137.46533   | 3.87987      | 45.1212           |
| 2    | 127.617              | 2599.70020   | 4.32672      | 54.8788           |

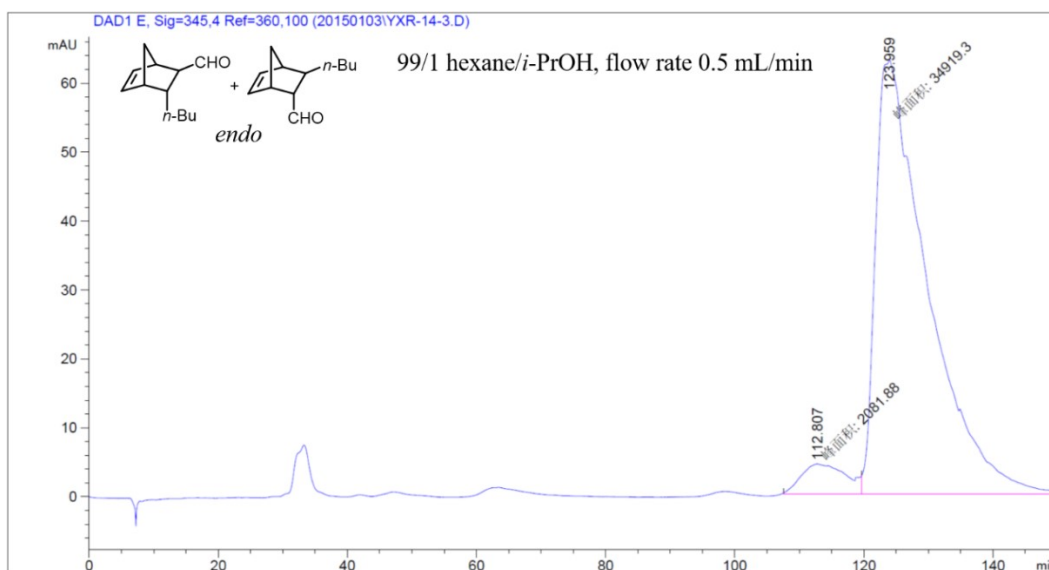

| Peak | Retention Time [min] | Area [mAU*s] | Height [mAU] | Relative Area [%] |
|------|----------------------|--------------|--------------|-------------------|
| 1    | 112.807              | 2081.88257   | 4.32419      | 5.6265            |
| 2    | 123.959              | 3.49193e4    | 62.86743     | 94.3735           |

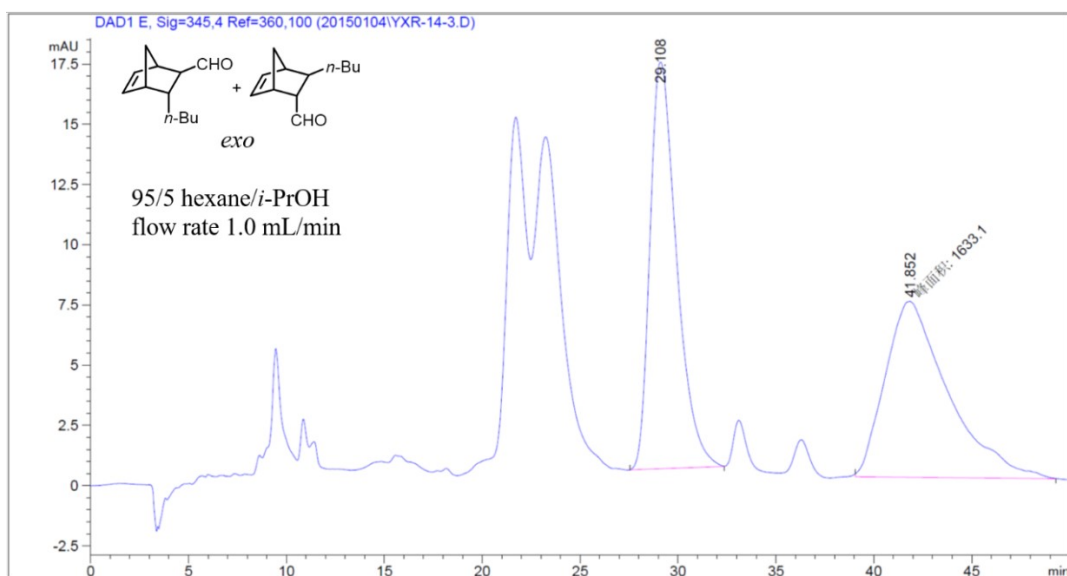

| Peak | Retention Time [min] | Area [mAU*s] | Height [mAU] | Relative Area [%] |
|------|----------------------|--------------|--------------|-------------------|
| 1    | 29.108               | 1597.34082   | 16.88131     | 49.4465           |
| 2    | 41.852               | 1633.10291   | 7.30475      | 50.5535           |

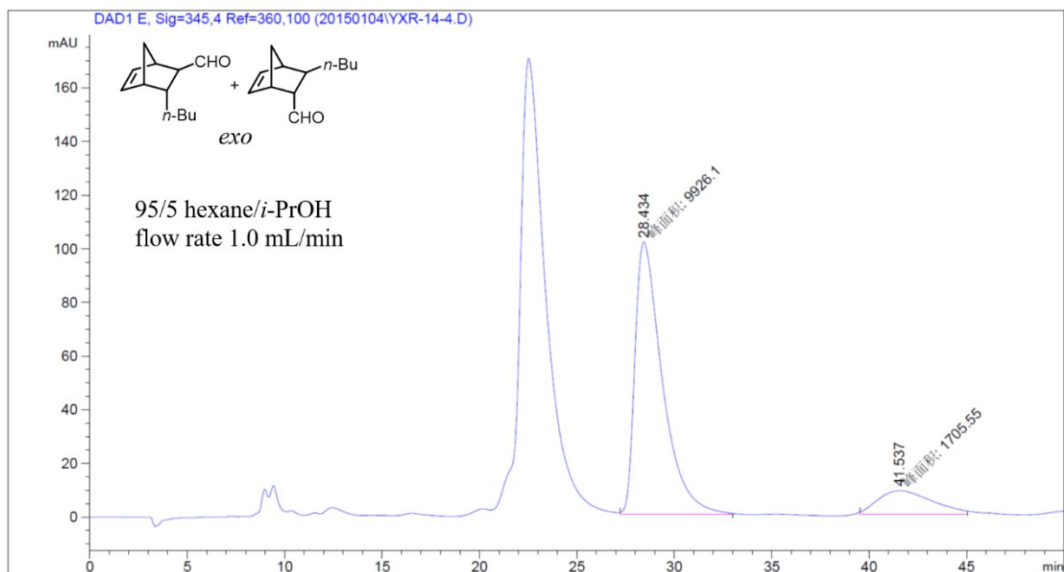

| Peak | Retention Time [min] | Area [mAU*s] | Height [mAU] | Relative Area [%] |
|------|----------------------|--------------|--------------|-------------------|
| 1    | 28.434               | 9926.09668   | 101.51617    | 85.3370           |
| 2    | 41.537               | 1705.55115   | 8.82788      | 14.6630           |

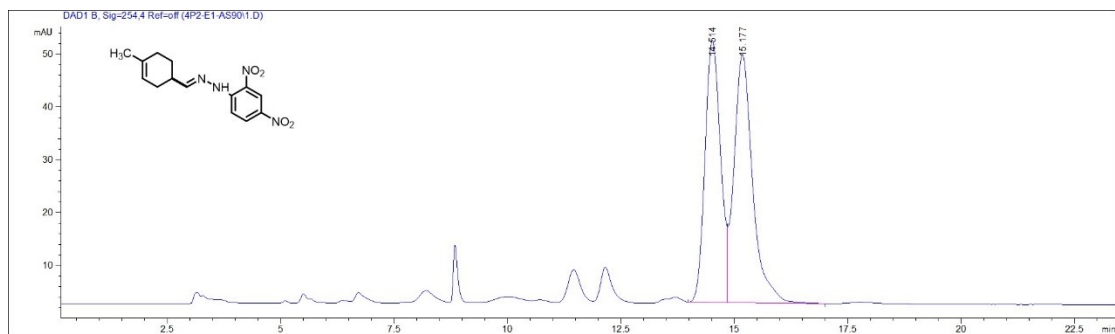

| Peak | Retention Time [min] | Area [mAU*s] | Height [mAU] | Relative Area [%] |
|------|----------------------|--------------|--------------|-------------------|
| 1    | 14.514               | 1184.17883   | 49.65815     | 40.5741           |
| 2    | 15.117               | 1343.25098   | 46.99037     | 46.0245           |



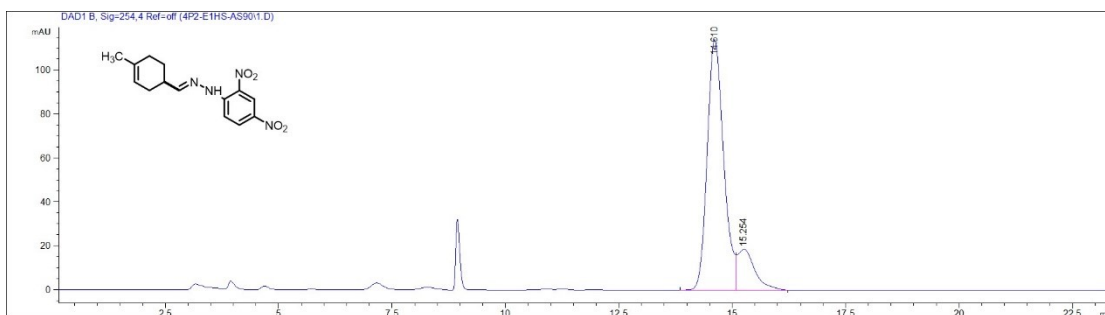

| Peak | Retention Time [min] | Area [mAU*s] | Height [mAU] | Relative Area [%] |
|------|----------------------|--------------|--------------|-------------------|
| 1    | 14.610               | 3448.31396   | 135.23485    | 51.6369           |
| 2    | 15.254               | 727.62213    | 24.74633     | 10.8958           |

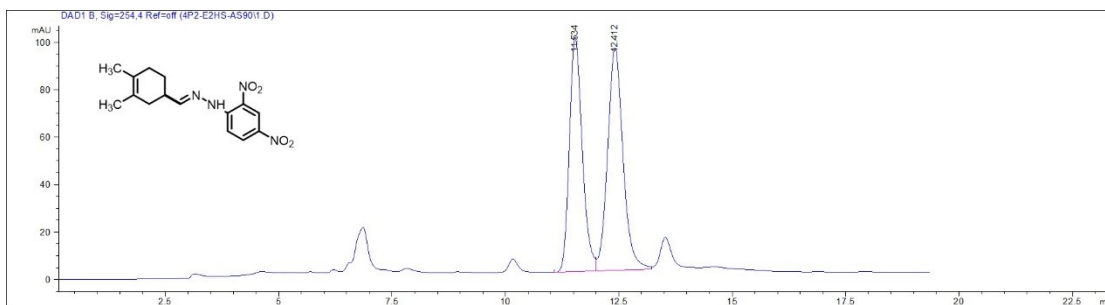

| Peak | Retention Time [min] | Area [mAU*s] | Height [mAU] | Relative Area [%] |
|------|----------------------|--------------|--------------|-------------------|
| 1    | 11.334               | 1948.85571   | 98.70258     | 39.6378           |
| 2    | 12.412               | 2220.75342   | 93.76180     | 45.1679           |

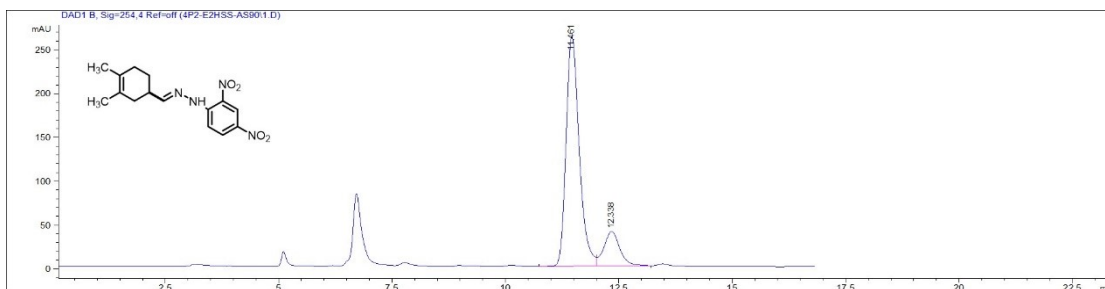

| Peak | Retention Time [min] | Area [mAU*s] | Height [mAU] | Relative Area [%] |
|------|----------------------|--------------|--------------|-------------------|
| 1    | 11.361               | 5259.41699   | 262.37720    | 67.9523           |
| 2    | 12.338               | 956.60291    | 39.48647     | 12.3594           |
